# Supplementary material for: Concise synthesis of 2,4-disubstituted thiazoles from β-azido disulfides and carboxylic acids or anhydrides: asymmetric synthesis of cystothiazole C
Source: Royal Society of Chemistry journal article supplement (doi:10.1039/c4ob01460j), 2014-08-28

## Supporting Information

### **Concise Synthesis of 2, 4-Disubstituted Thiazoles from $\beta$ -Azido Disulfides and Carboxylic Acids or Anhydrides: Asymmetric Synthesis of Cystothiazole C**

Yi Liu<sup>a,b</sup>, Xue Sun<sup>a,b</sup>, Xing, Zhang<sup>a</sup>, Jun Liu<sup>\*a</sup> and Yuguo Du<sup>\*a,b</sup>

*<sup>a</sup>State Key Laboratory of Environmental Chemistry and Eco-toxicology, Research Center for Eco-Environmental Sciences, Chinese Academy of Sciences, Beijing 100085, China, and <sup>b</sup>School of Chemistry and Chemical Engineering, University of Chinese Academy of Sciences, Beijing 100049, China.*

**e.e.-Determination of 10j and its enantiomer by using HPLC with chiral modified column.**

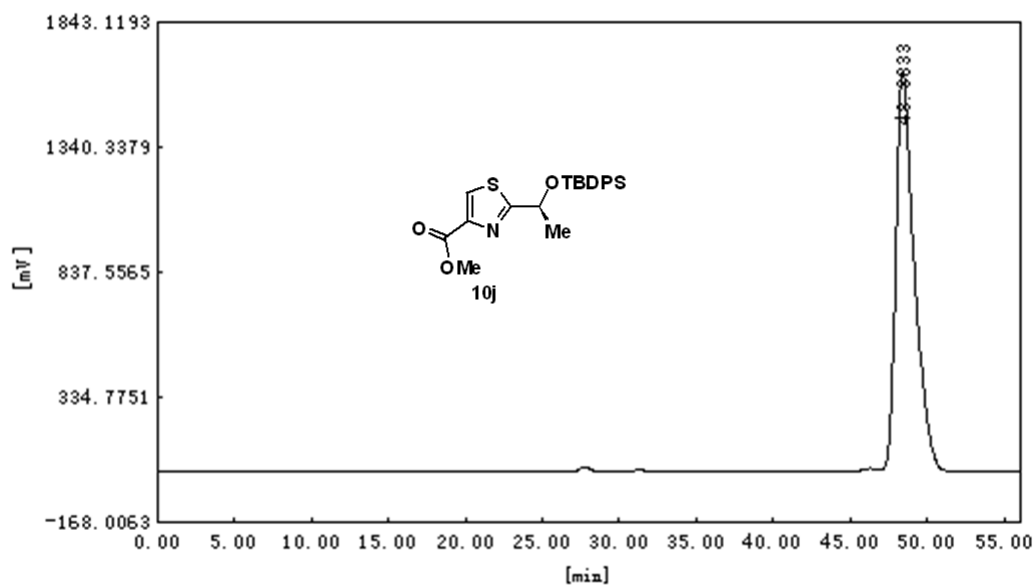

Enantiomer analysis for our synthetic **10j**.

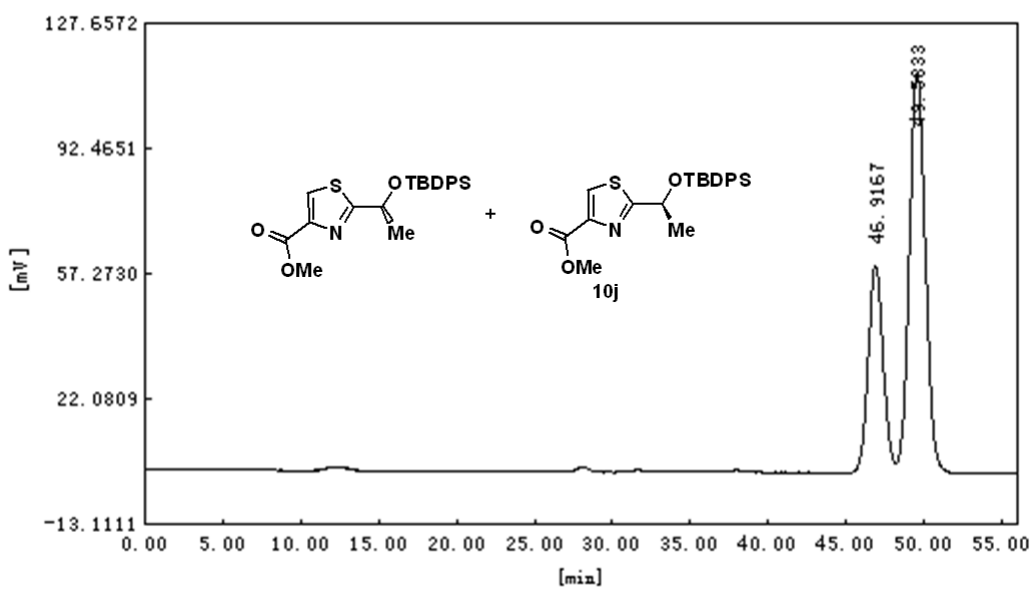

Chirality analysis for an authentic sample by mixing of **10j** and its enantiomer

# Copies of NMR Spectra

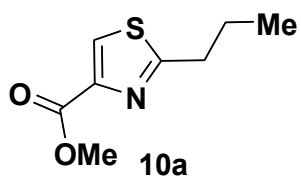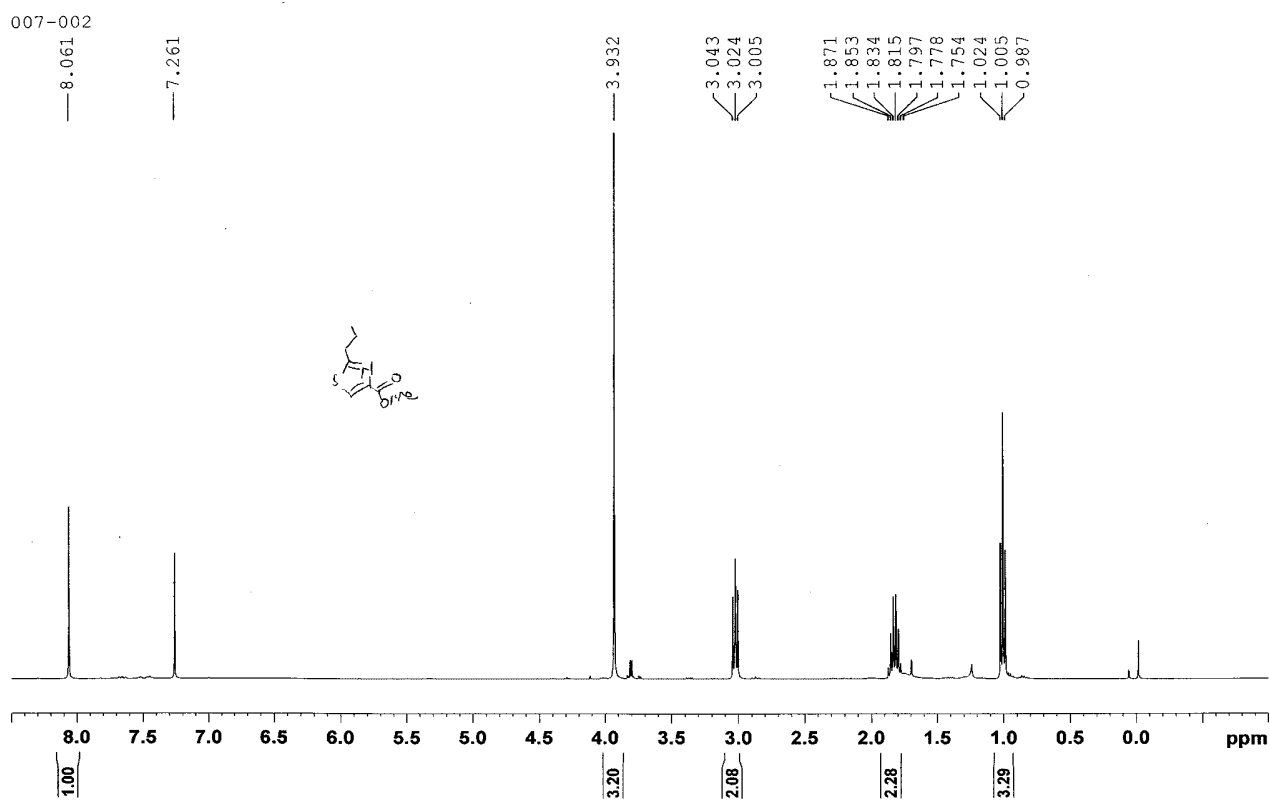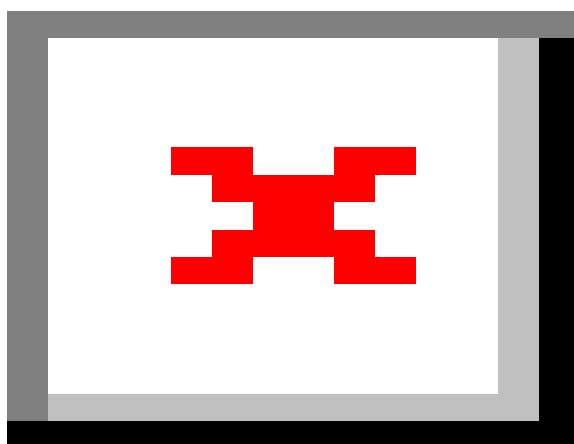

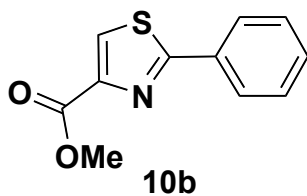

07-061-001

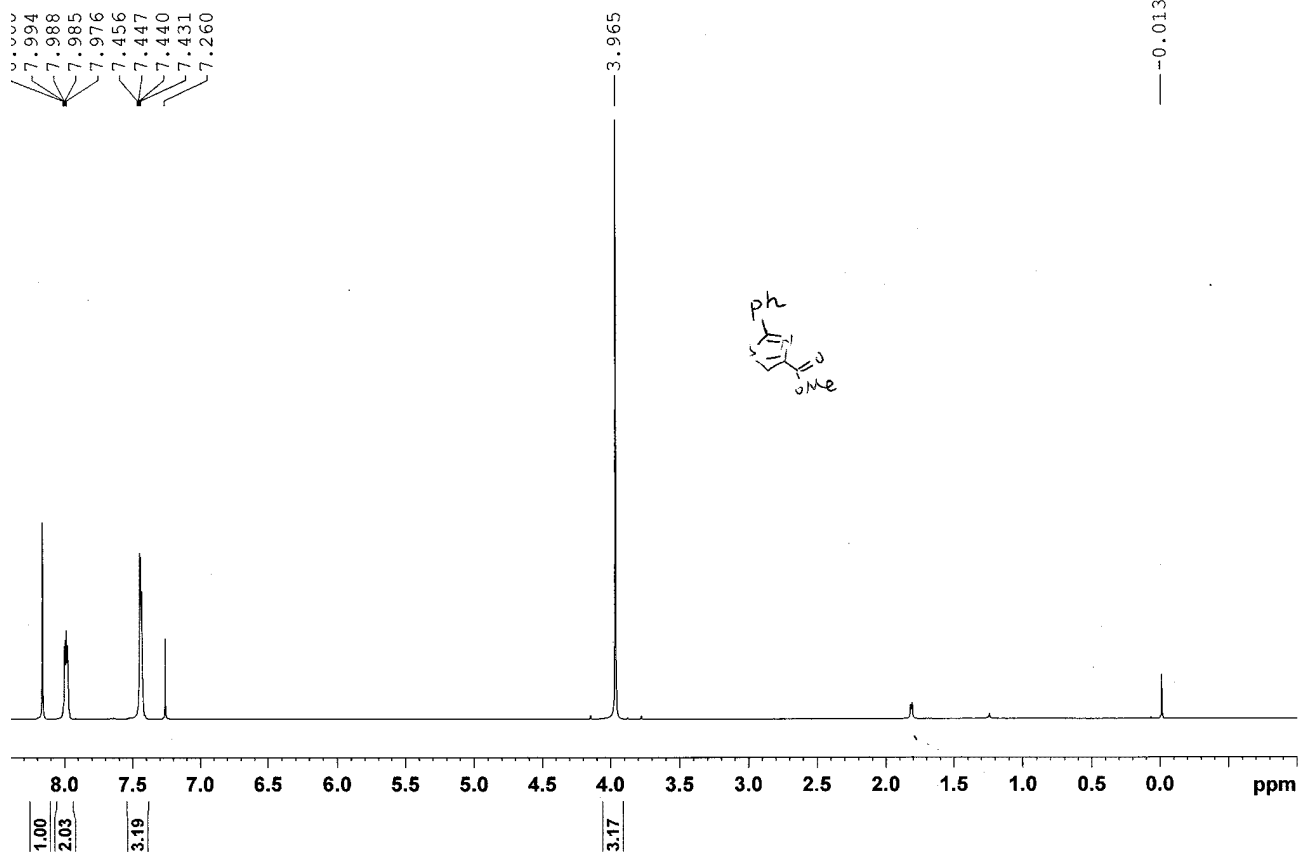

007-063-001

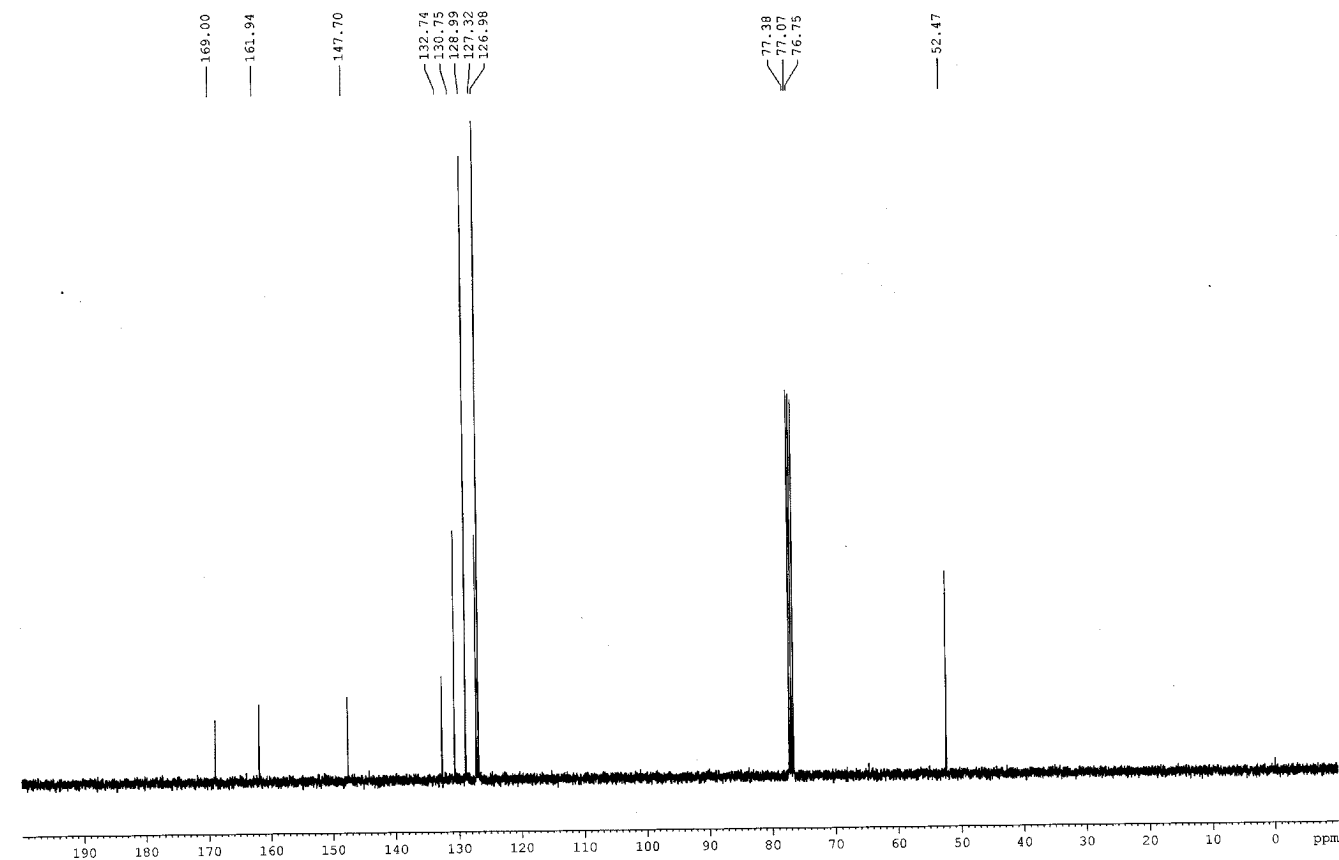

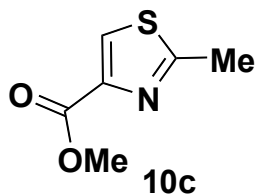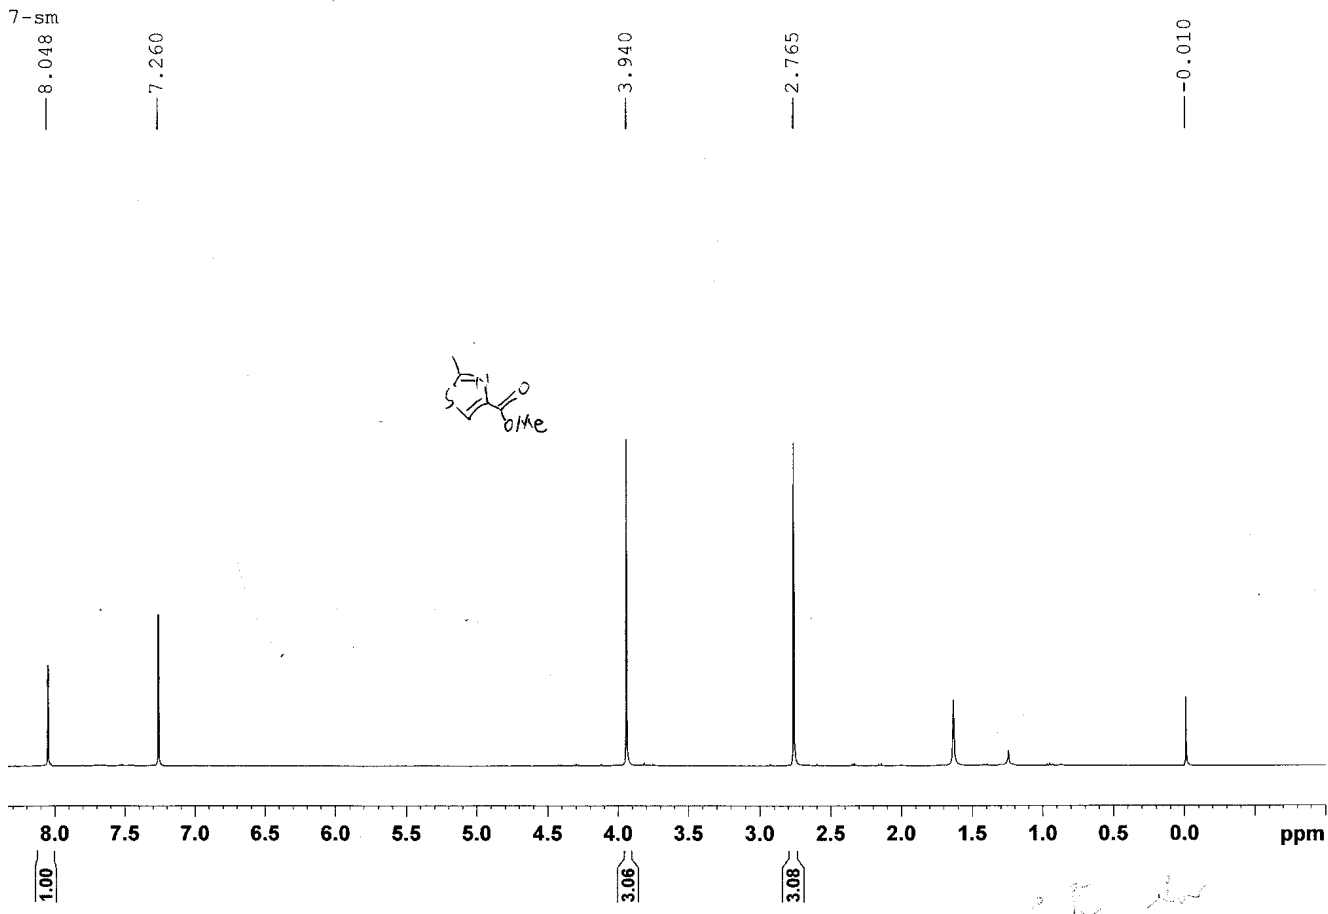

007-070-001-ch3cooh

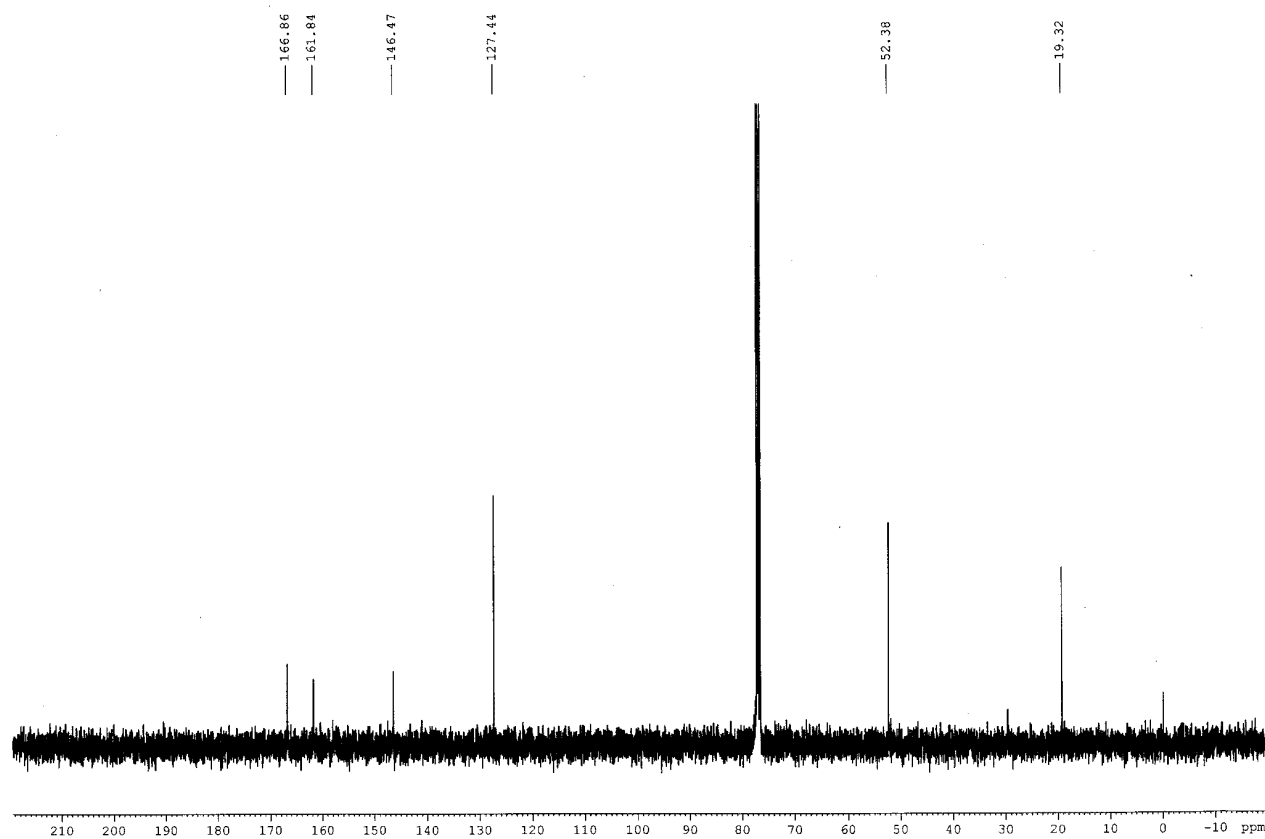

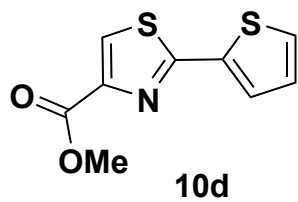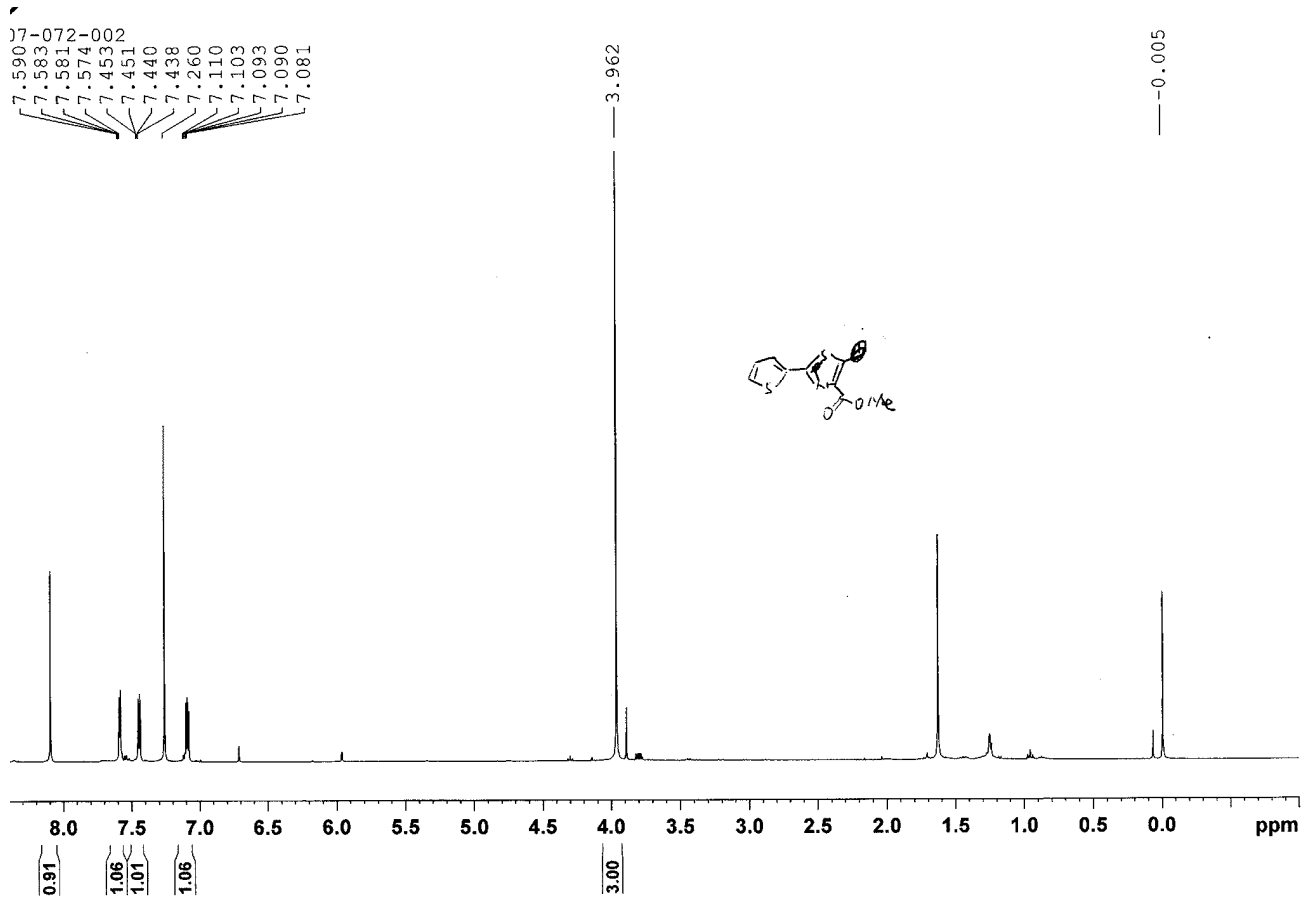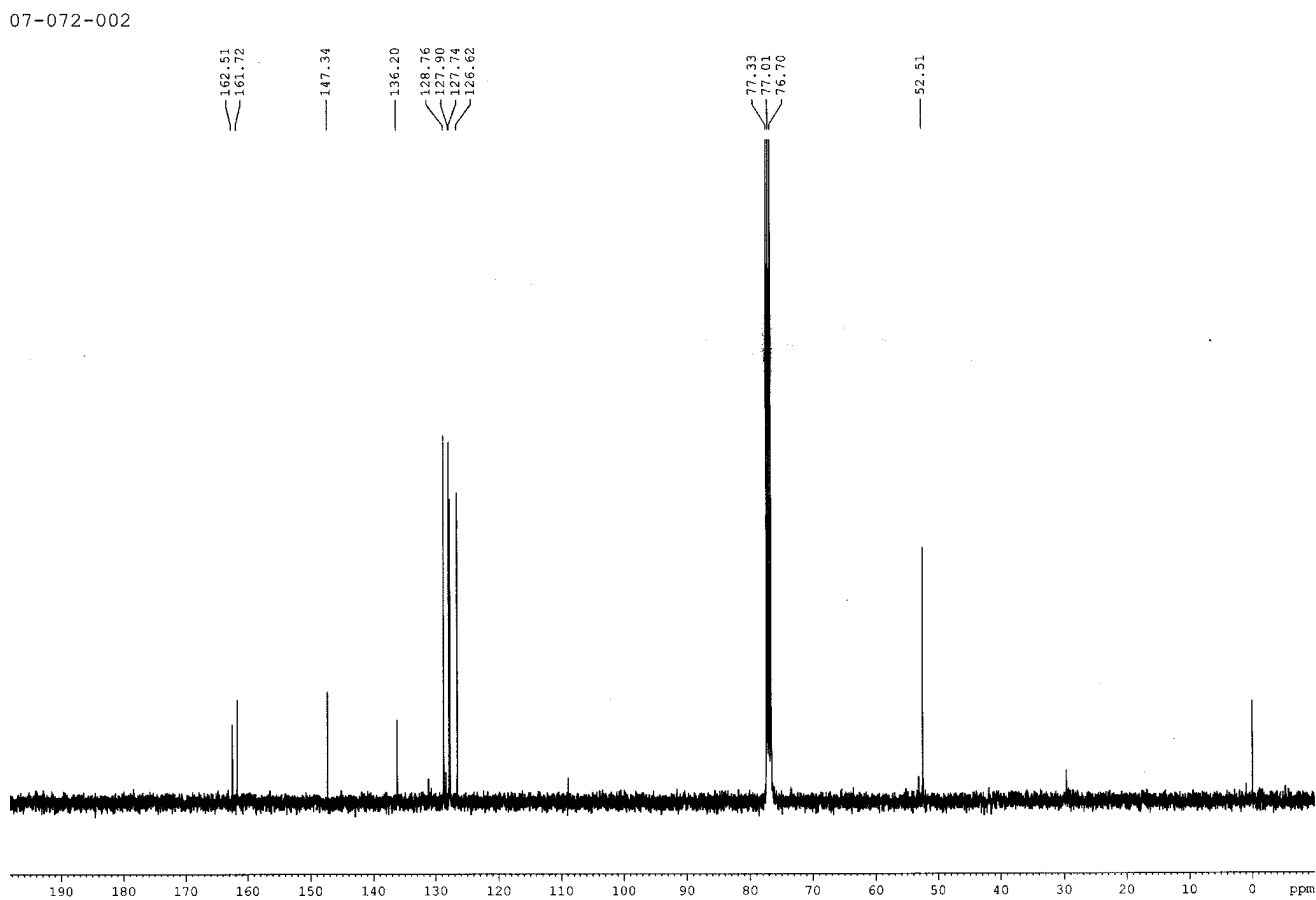

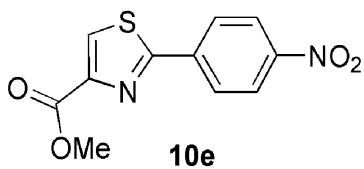

18-002-001

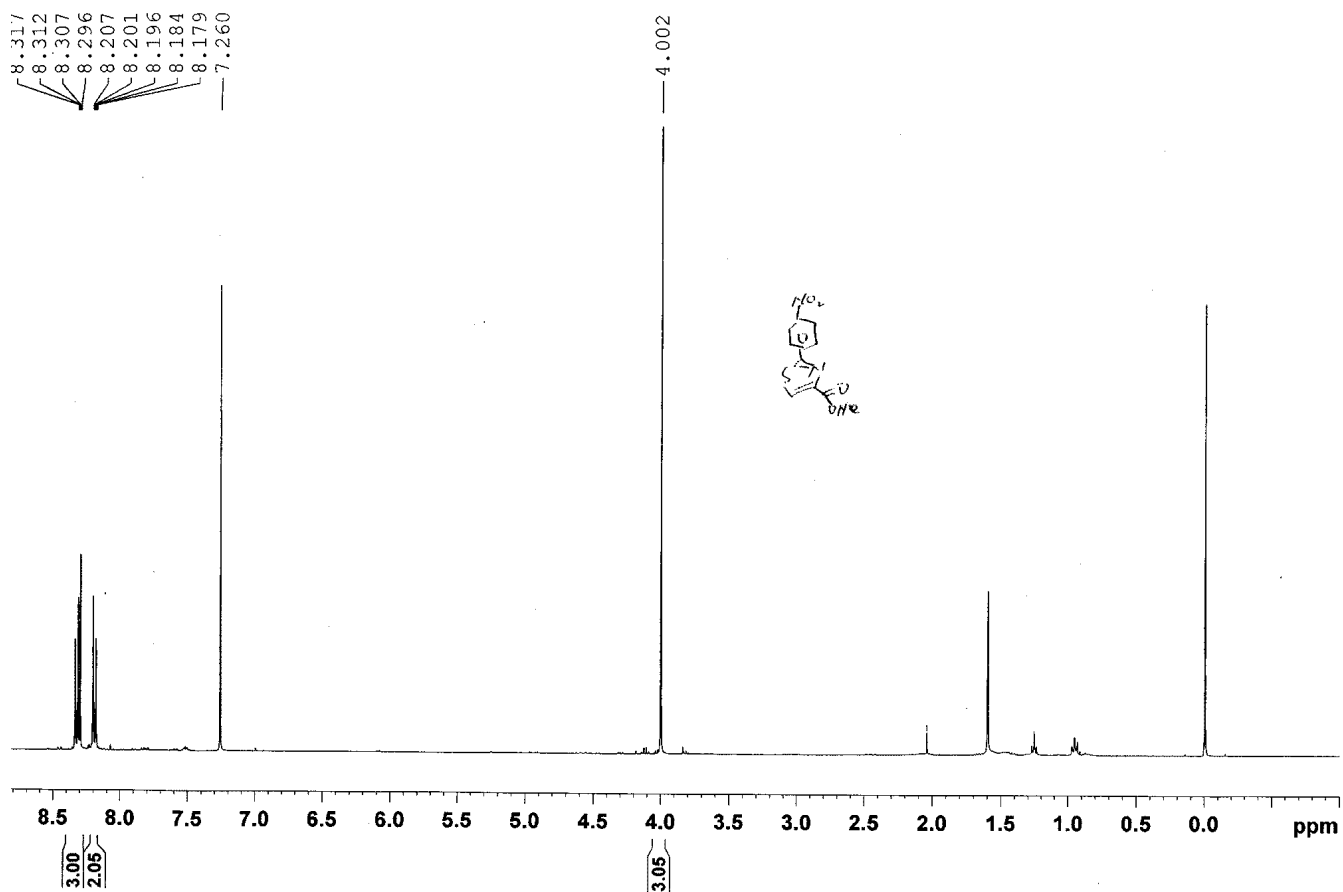

008-001-001

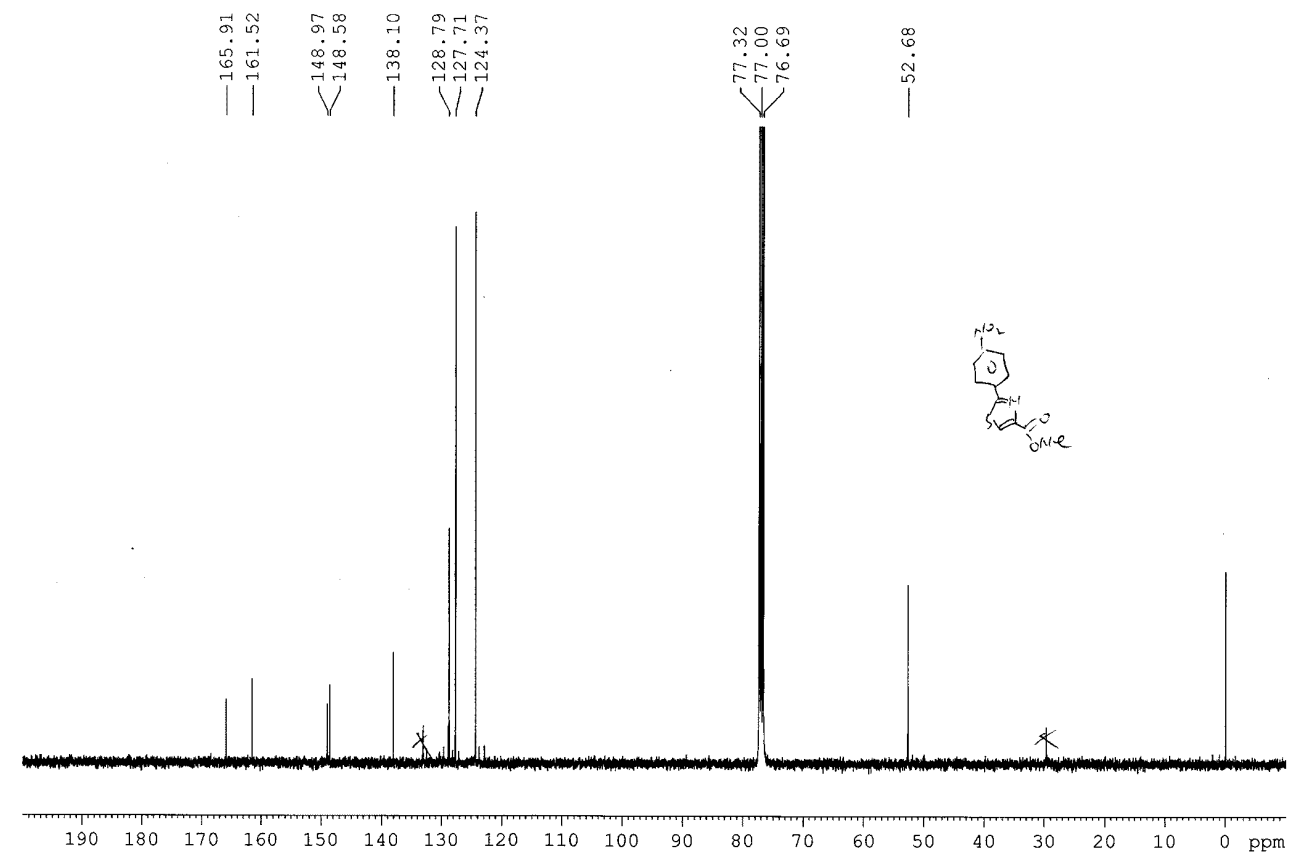

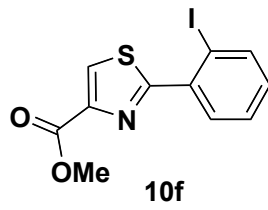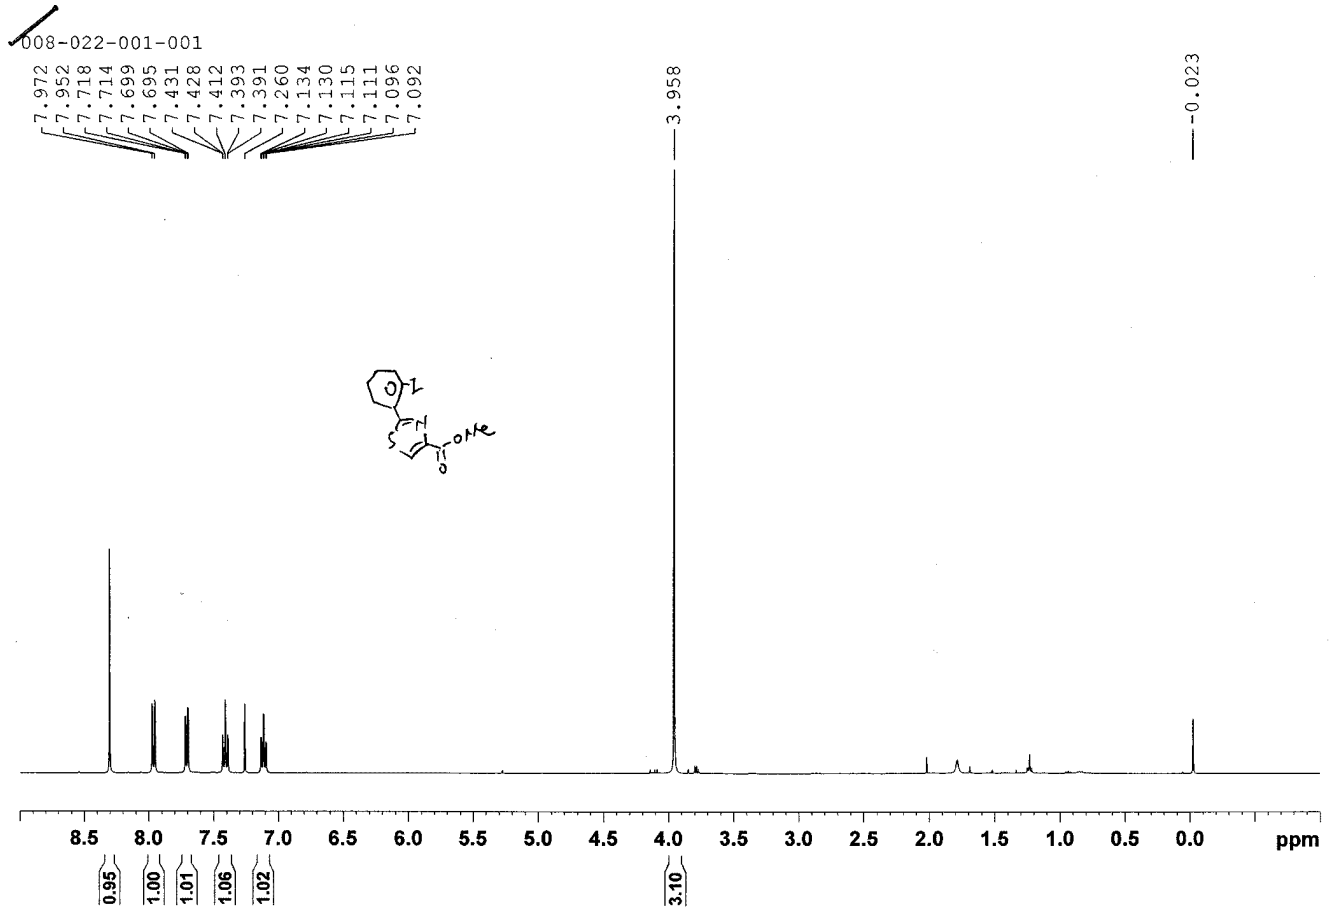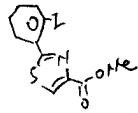

008-022-001-001

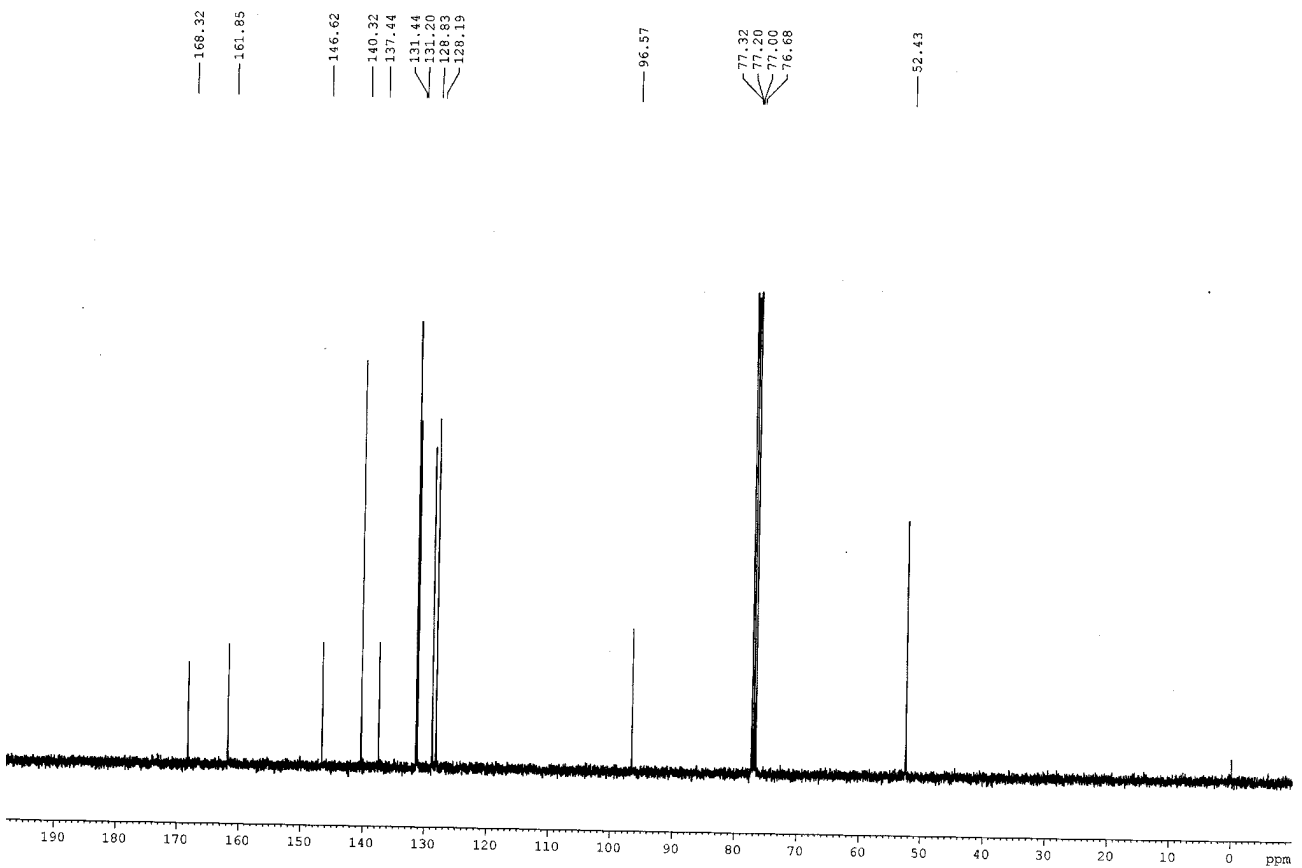



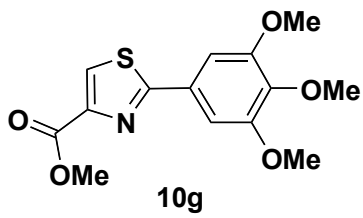

38-029-001

8.117

7.260  
7.170

3.933  
3.914  
3.862

-0.044

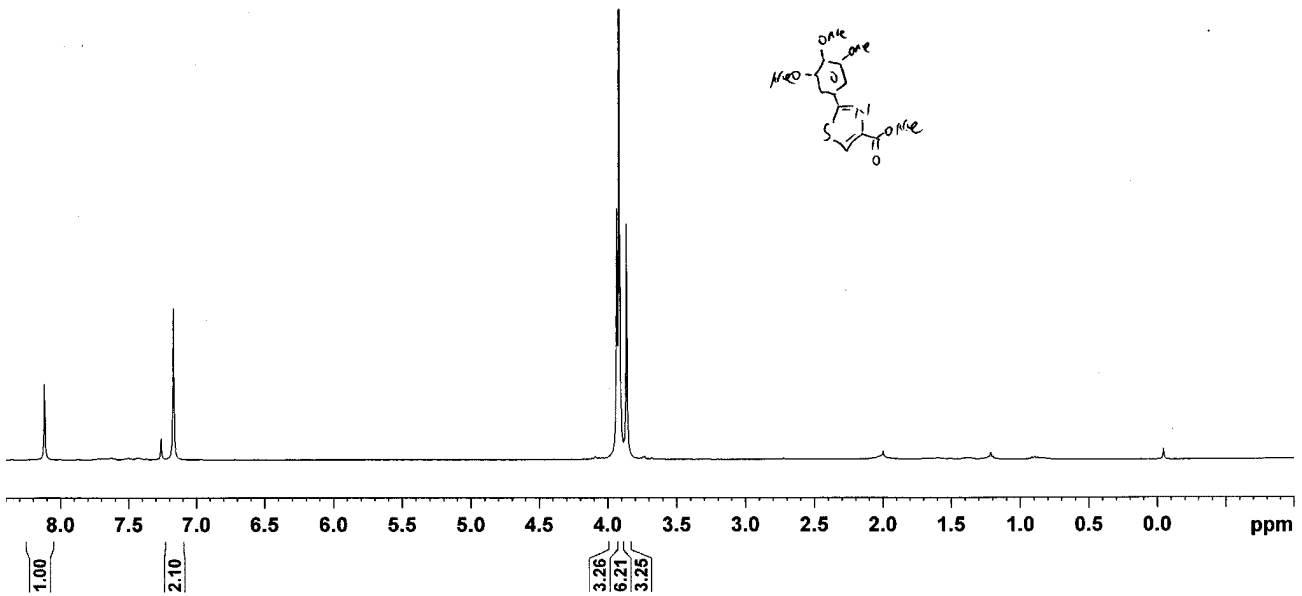

108-029-001

168.82

161.84

153.56

147.49

140.42

128.21  
127.18

104.25

77.42  
77.10  
76.78

60.95

56.37

52.42

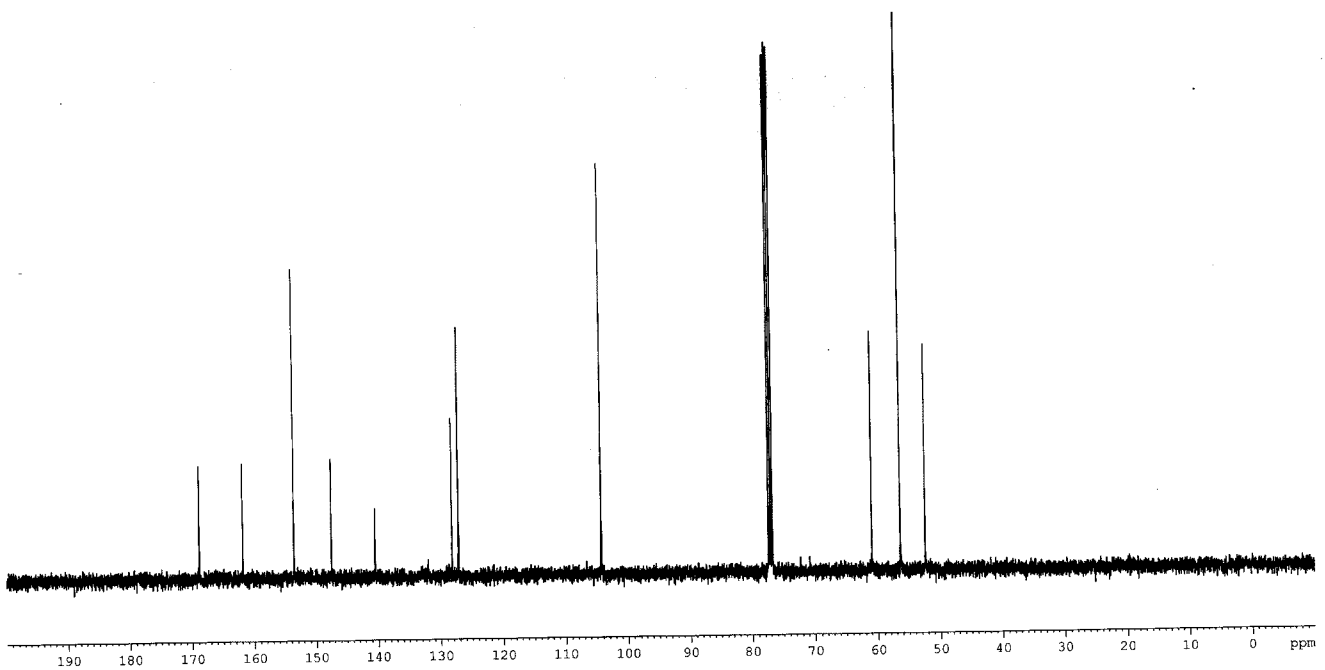

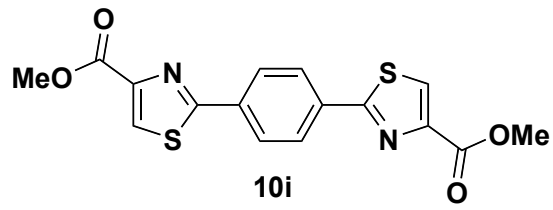

b00531-duibenerjiasuan-thiazole-08

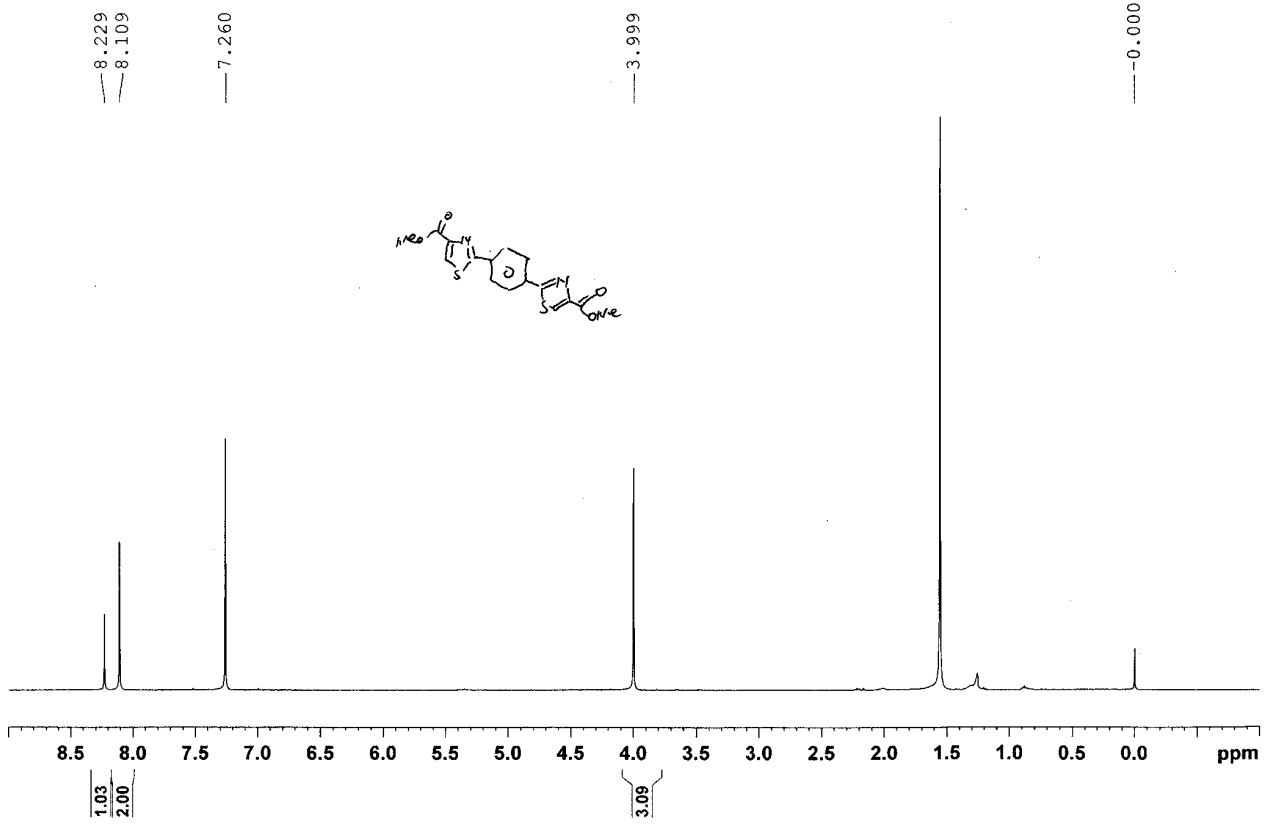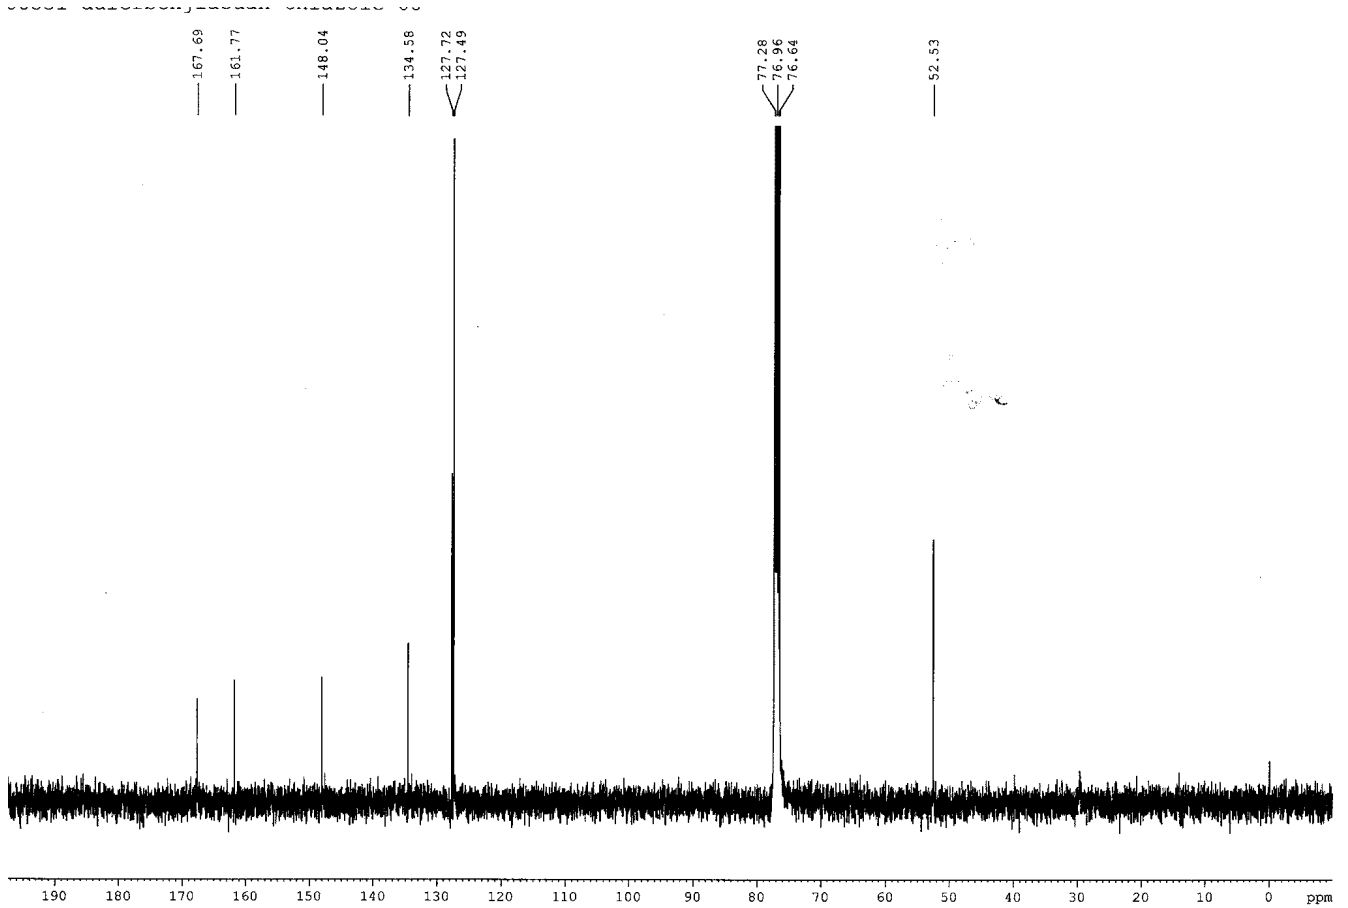

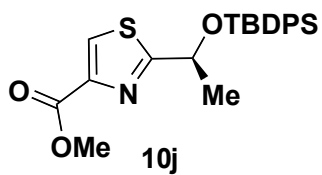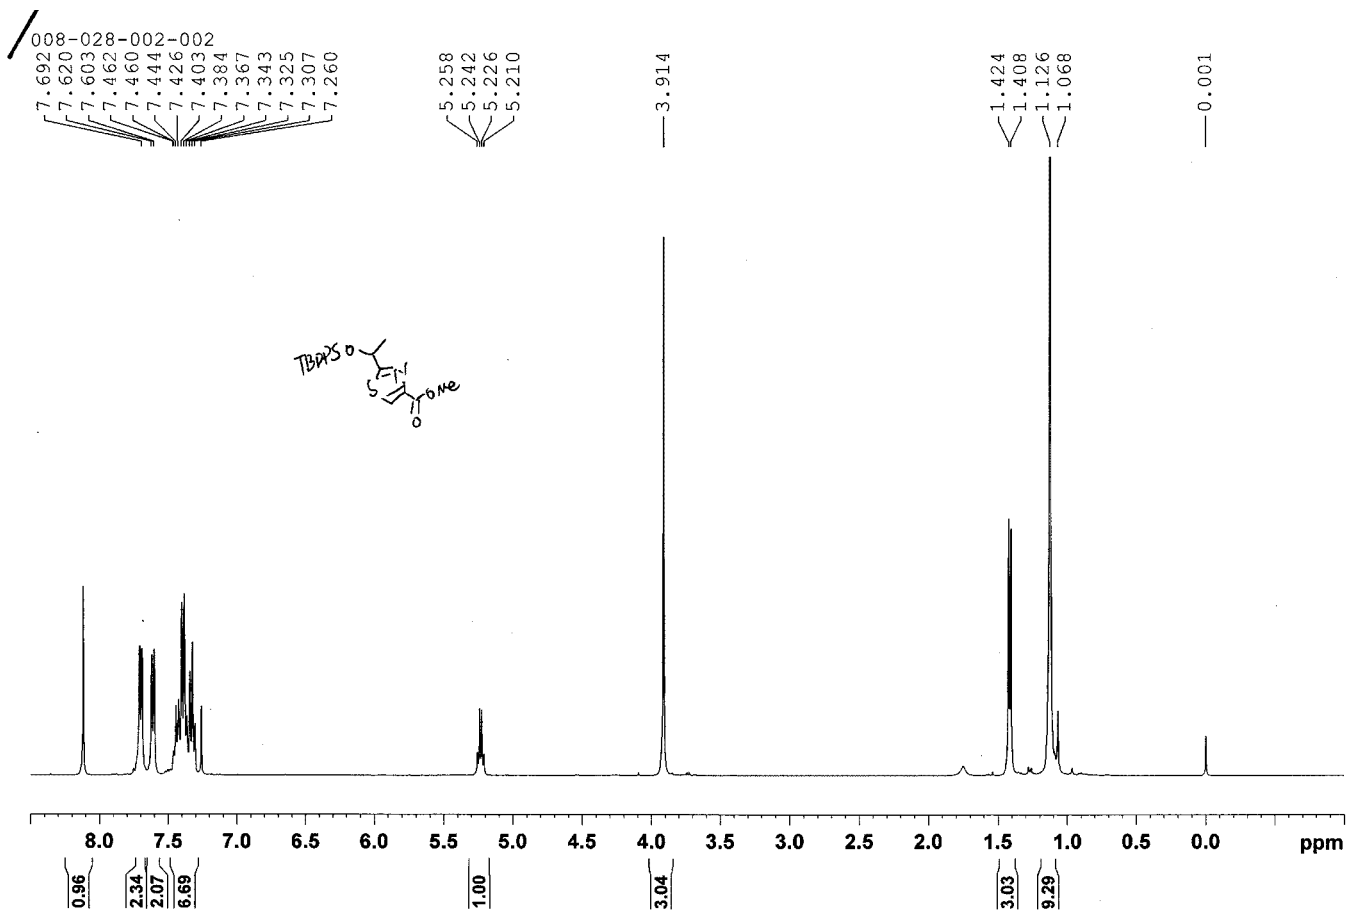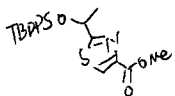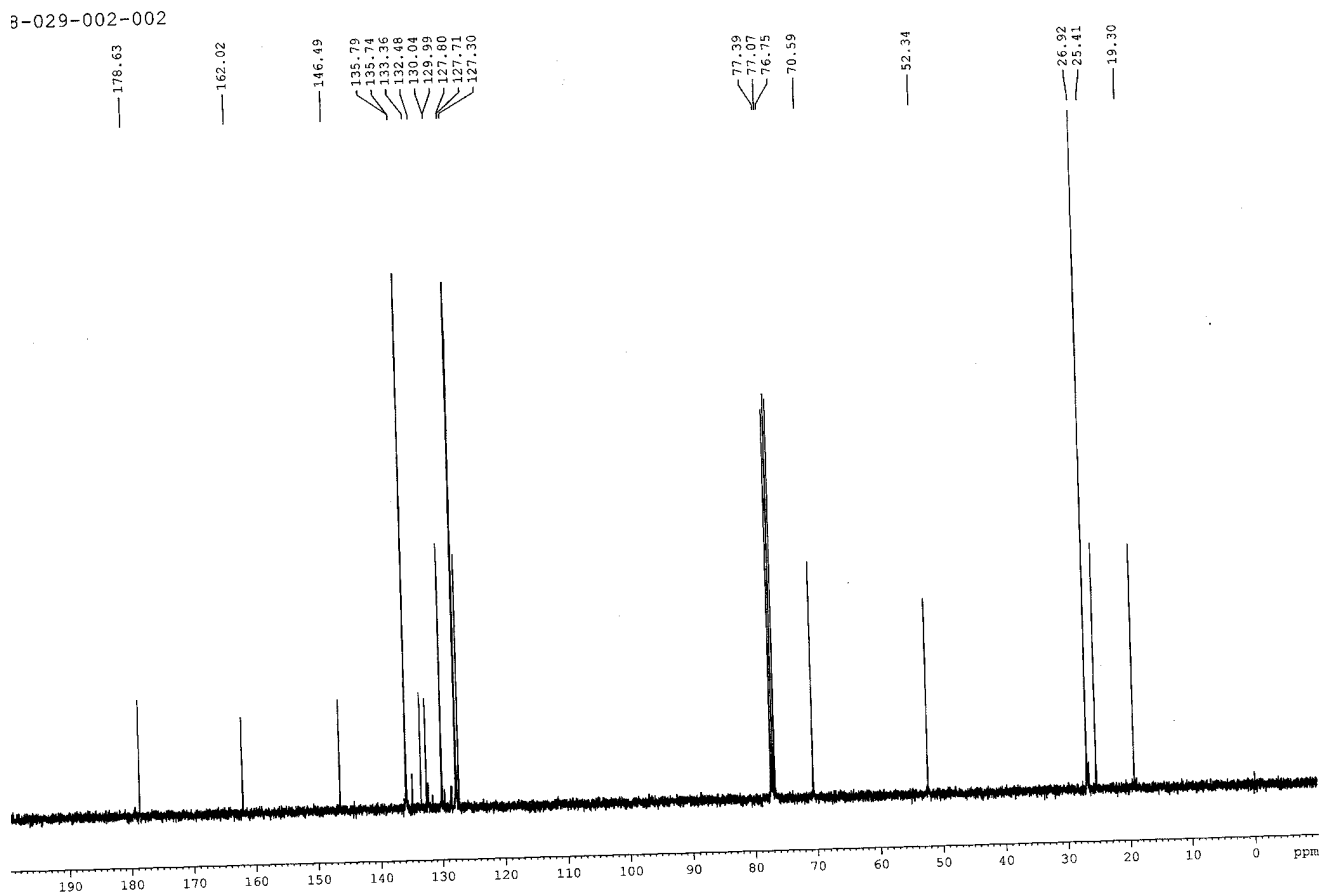

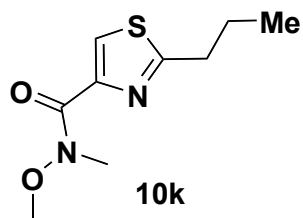

7-069-002-500000

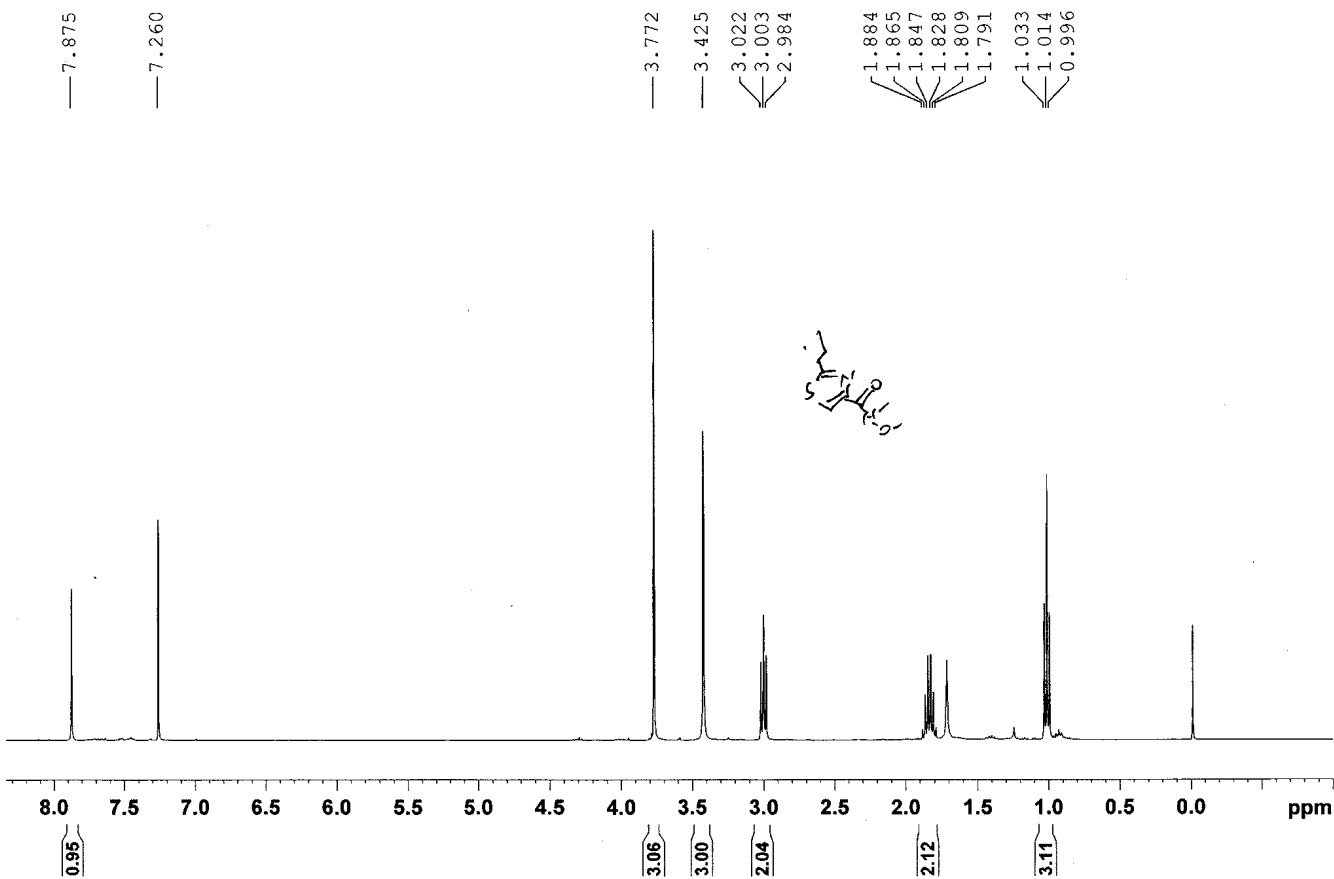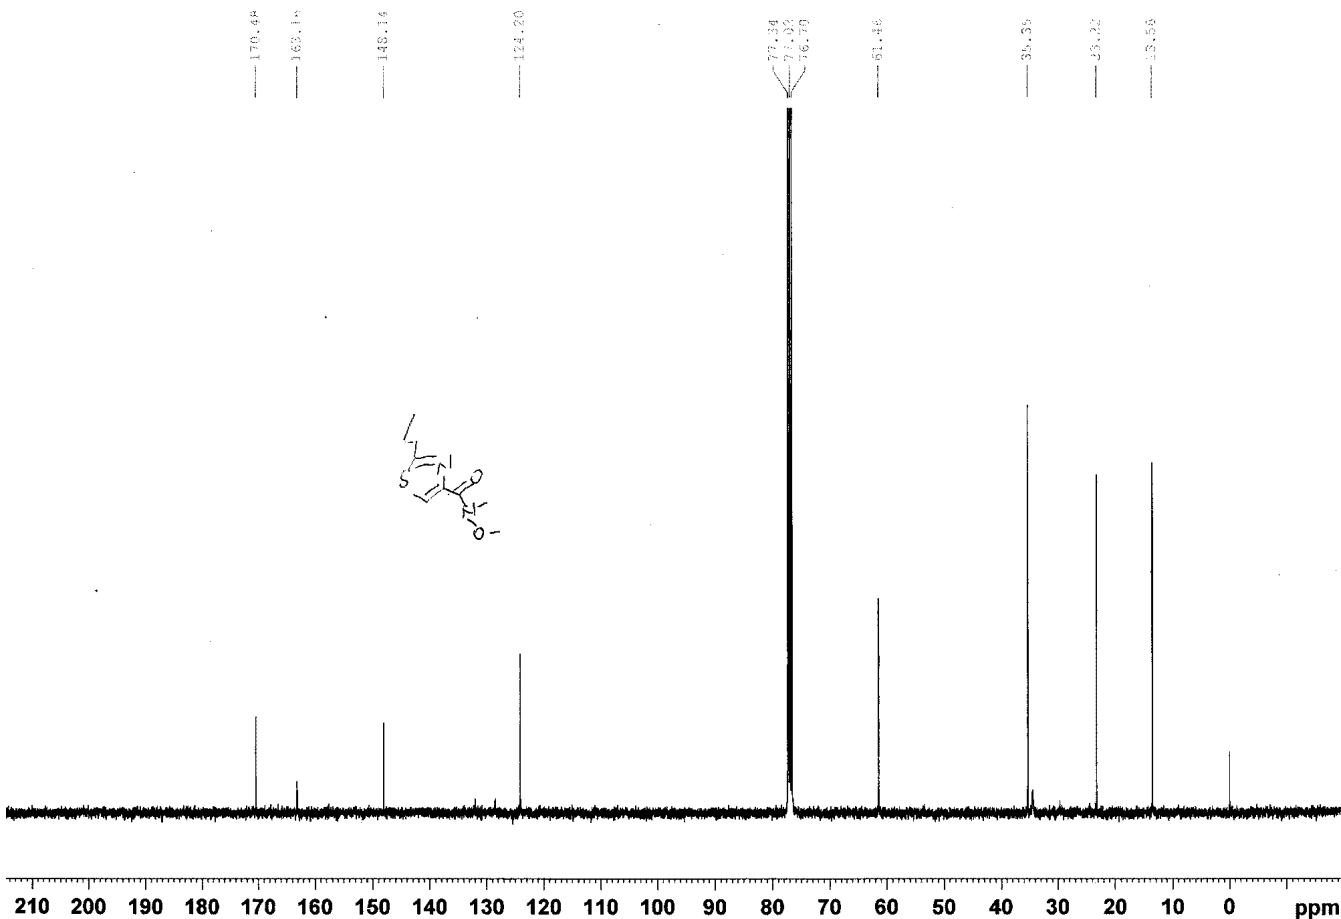

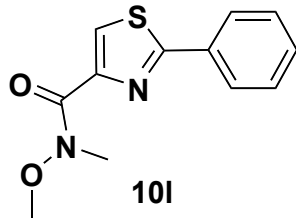

007-069-001

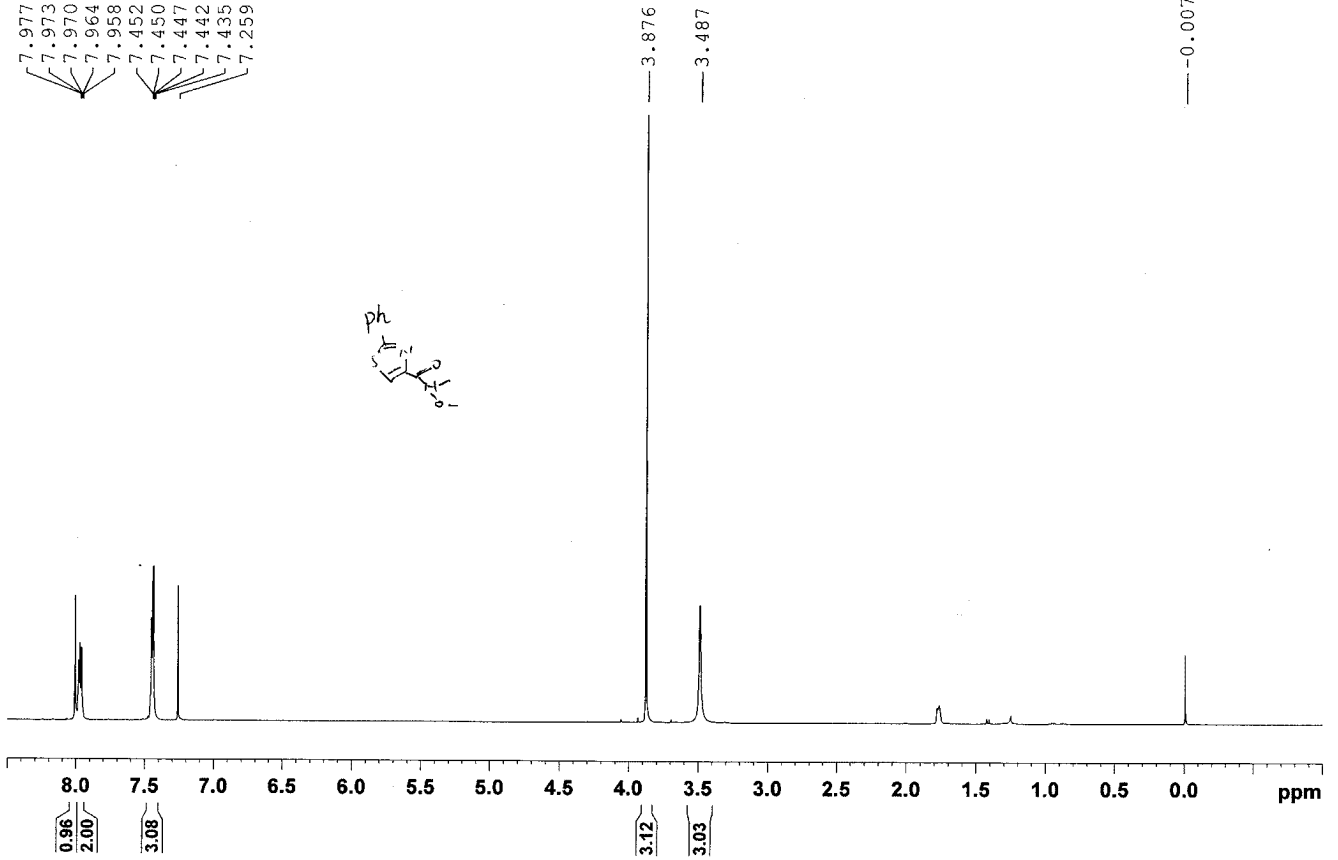

7-069-001

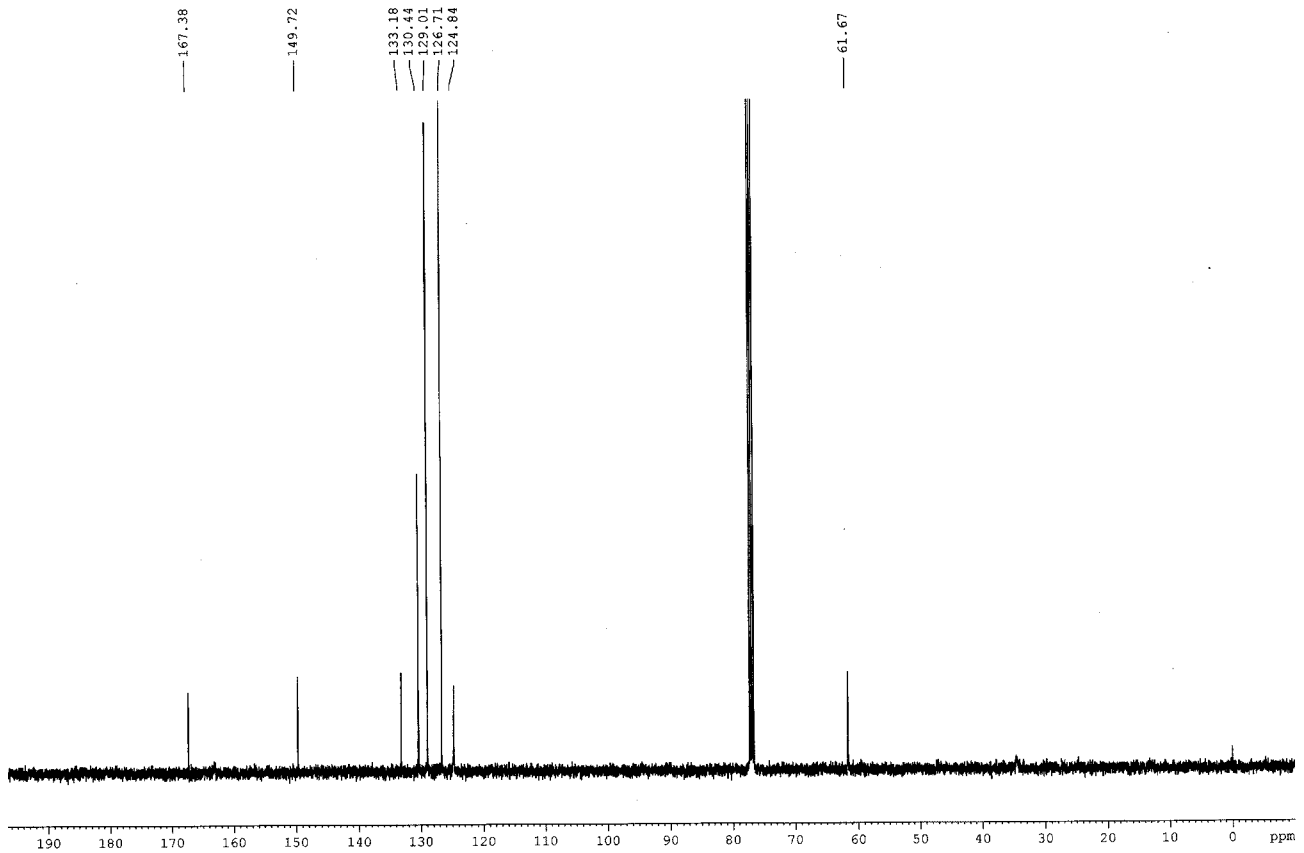

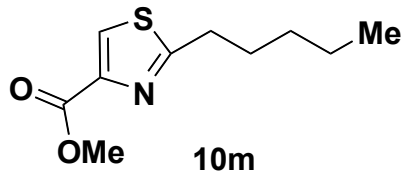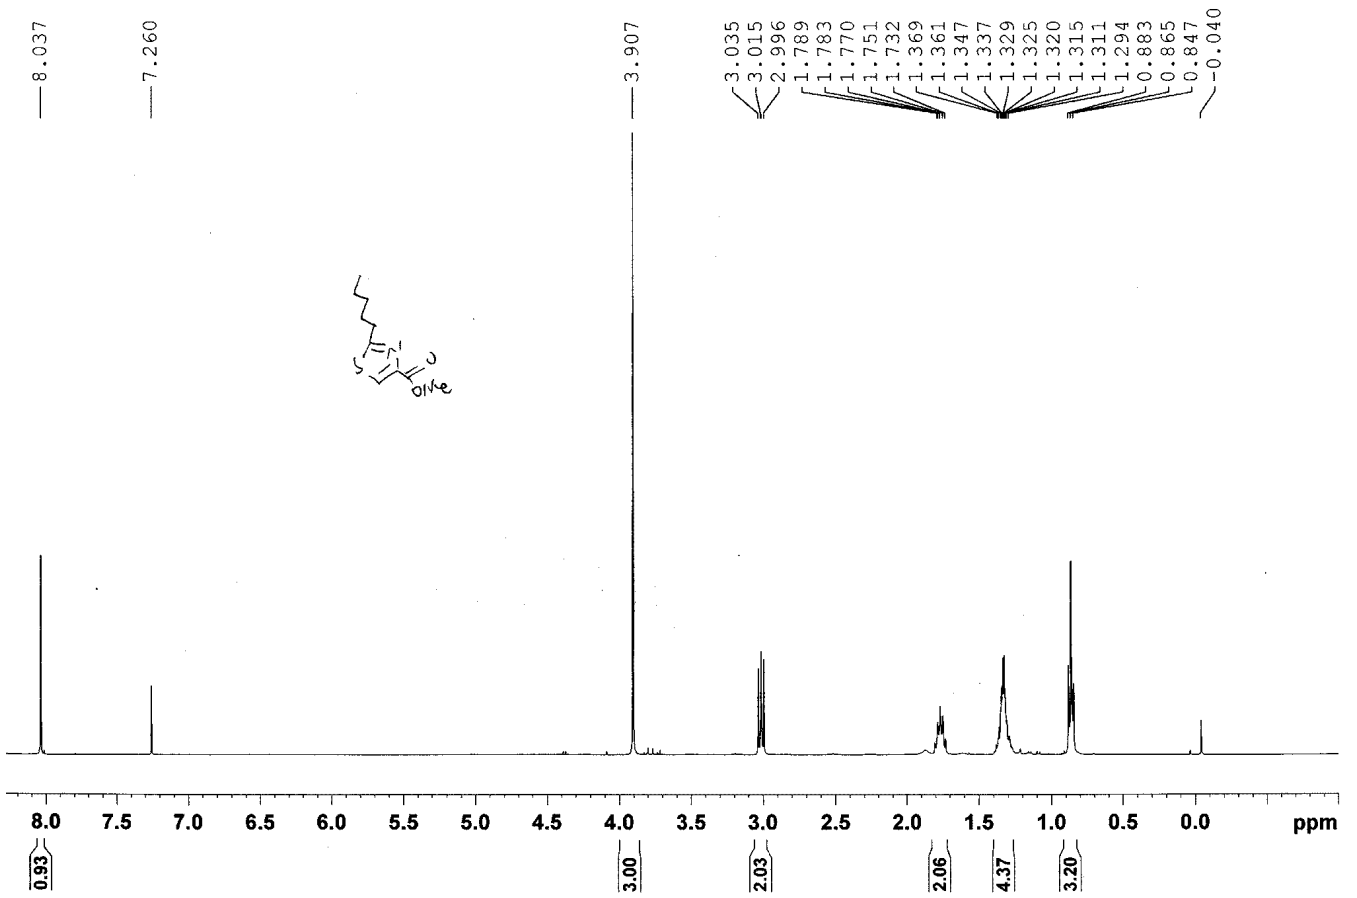

J07-076-001

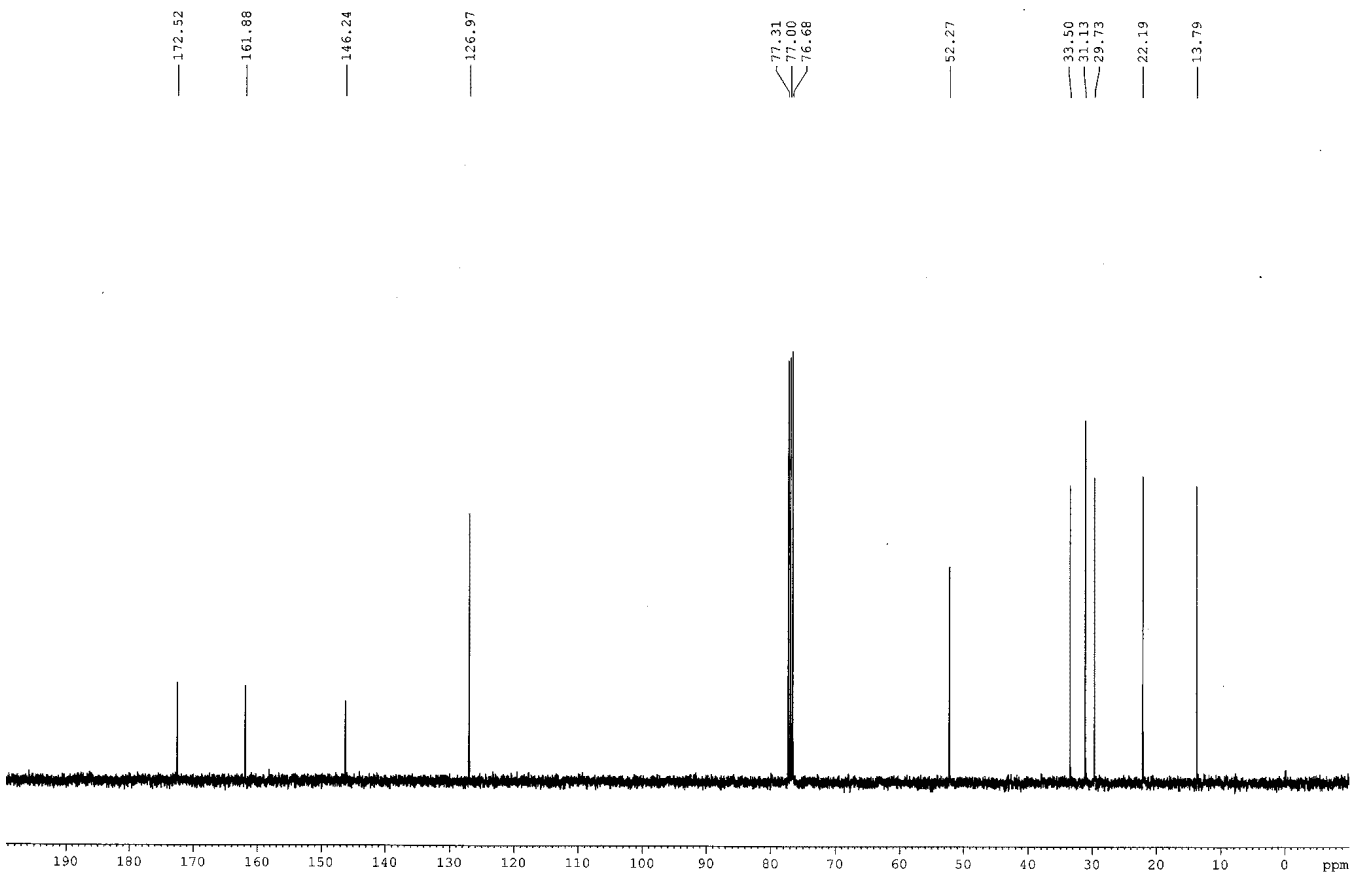

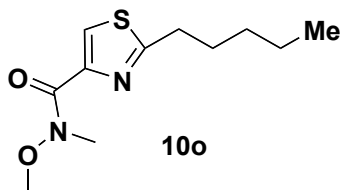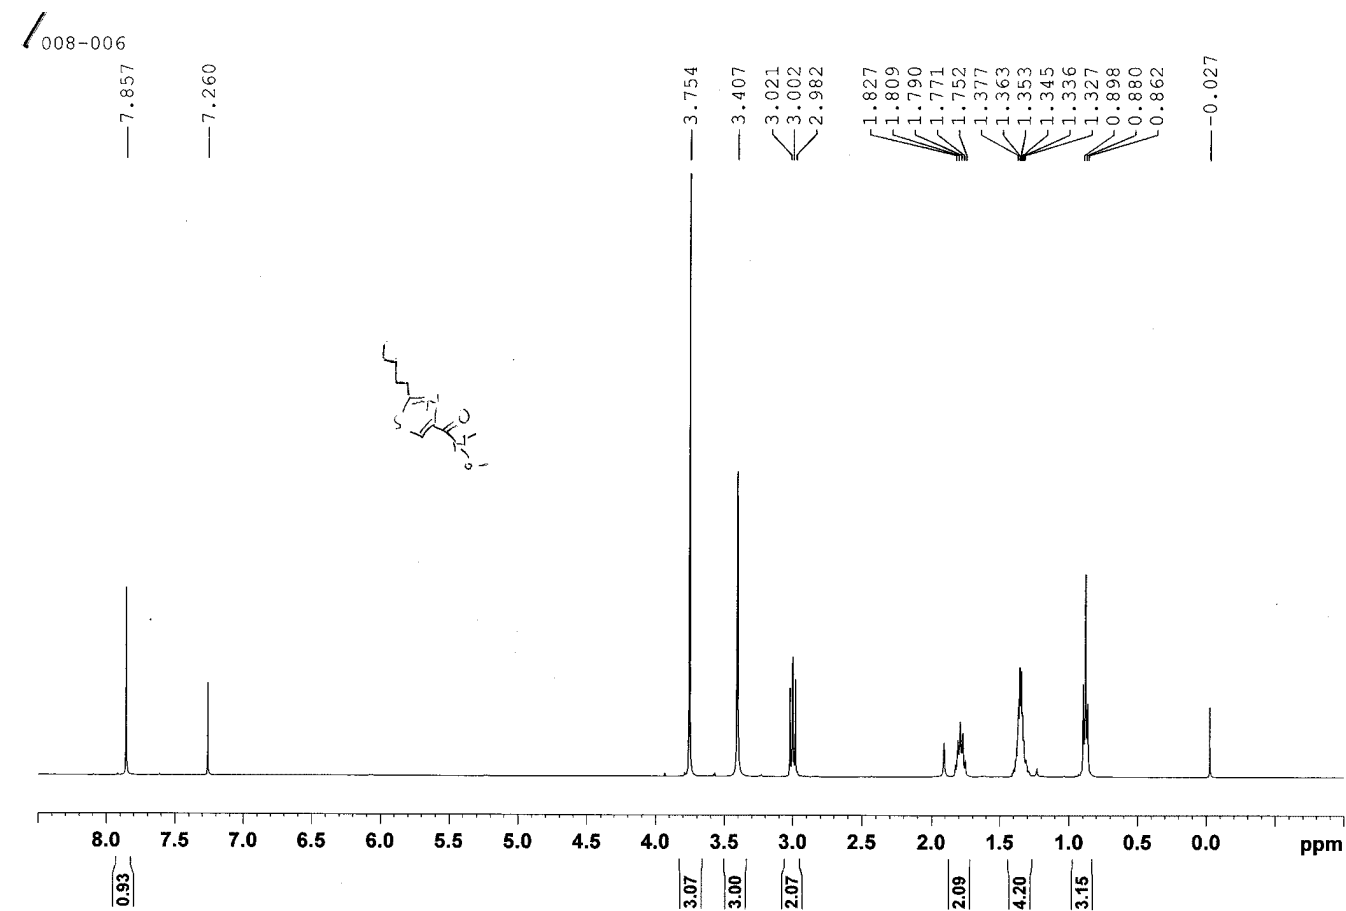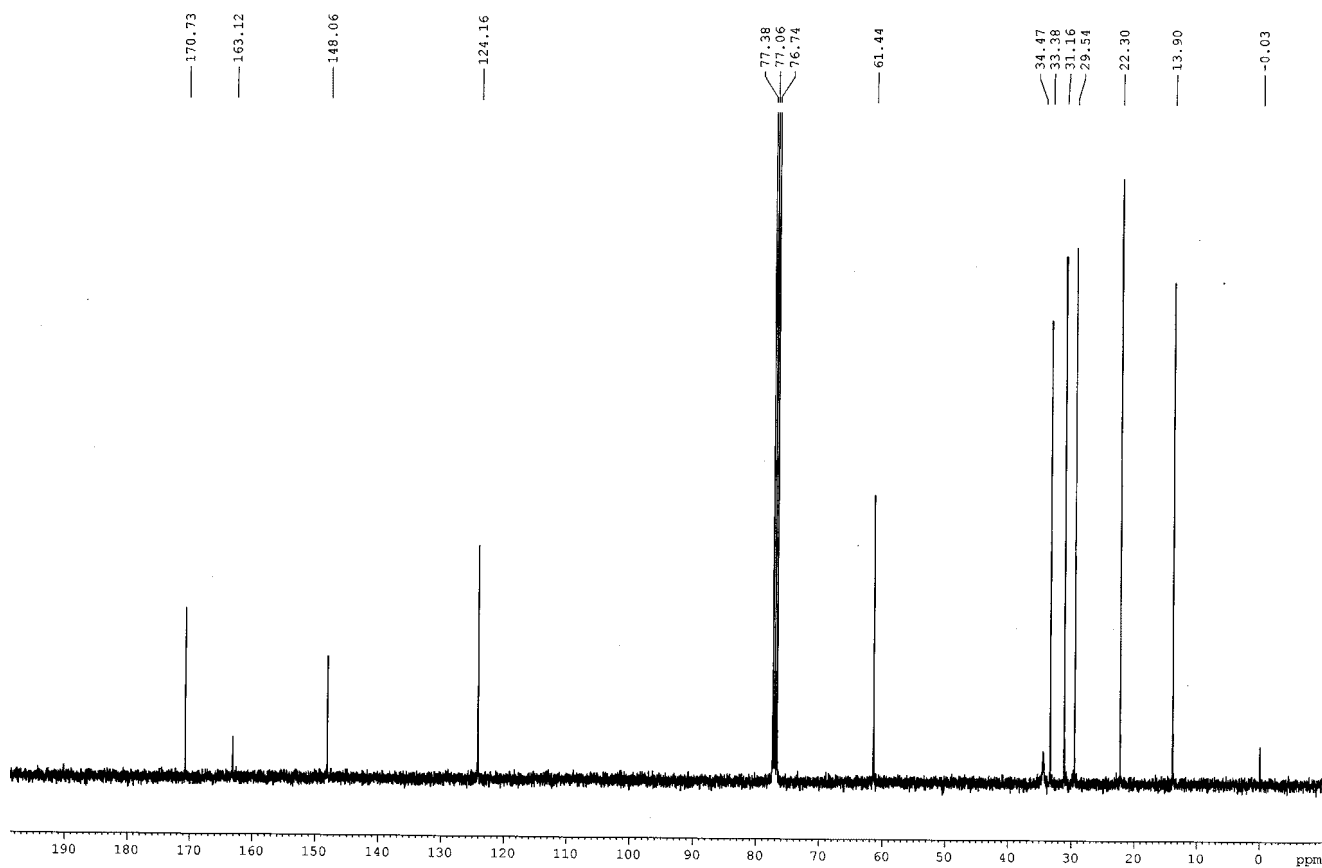

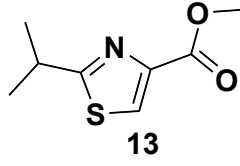

7-064-001

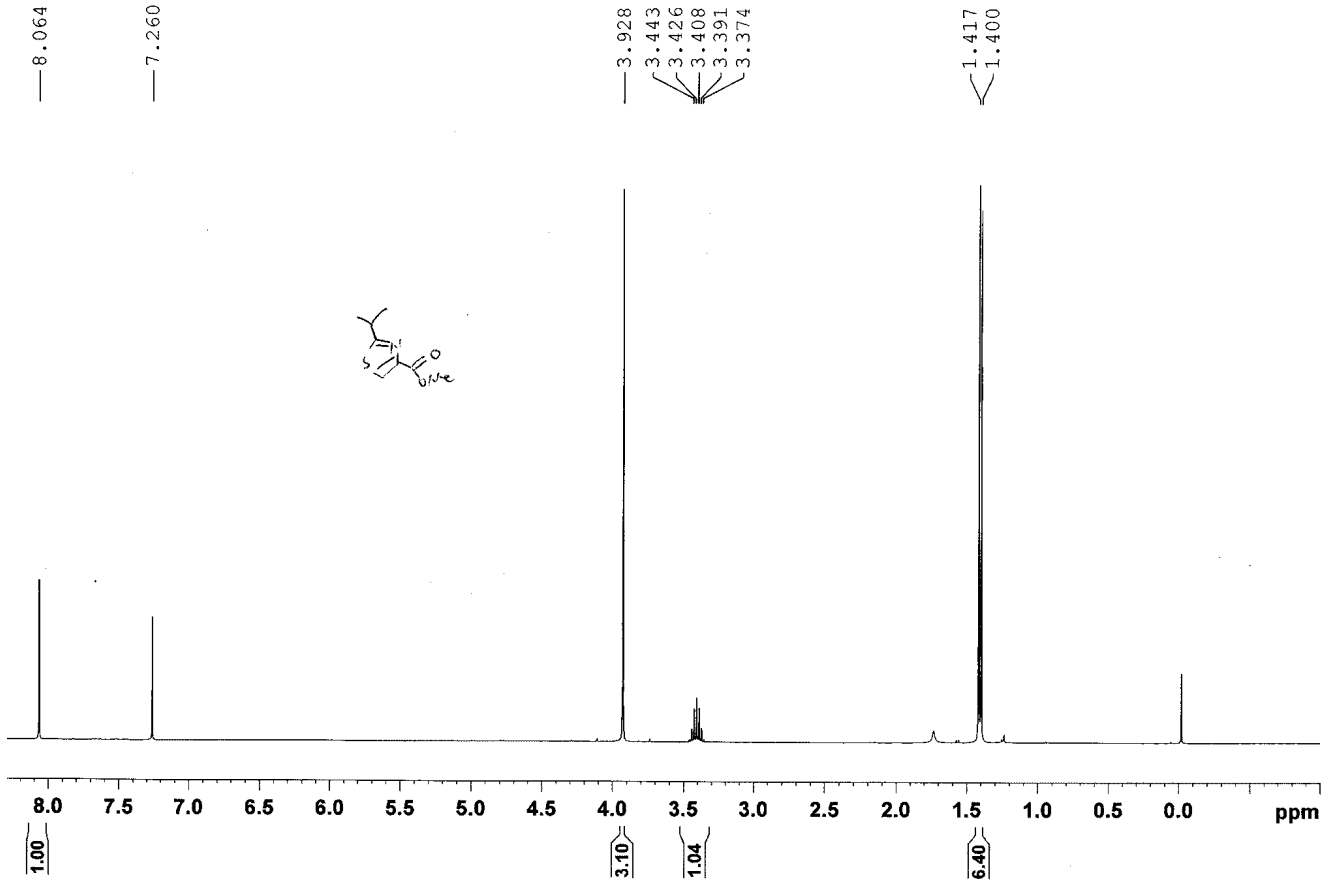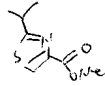

007-064-001

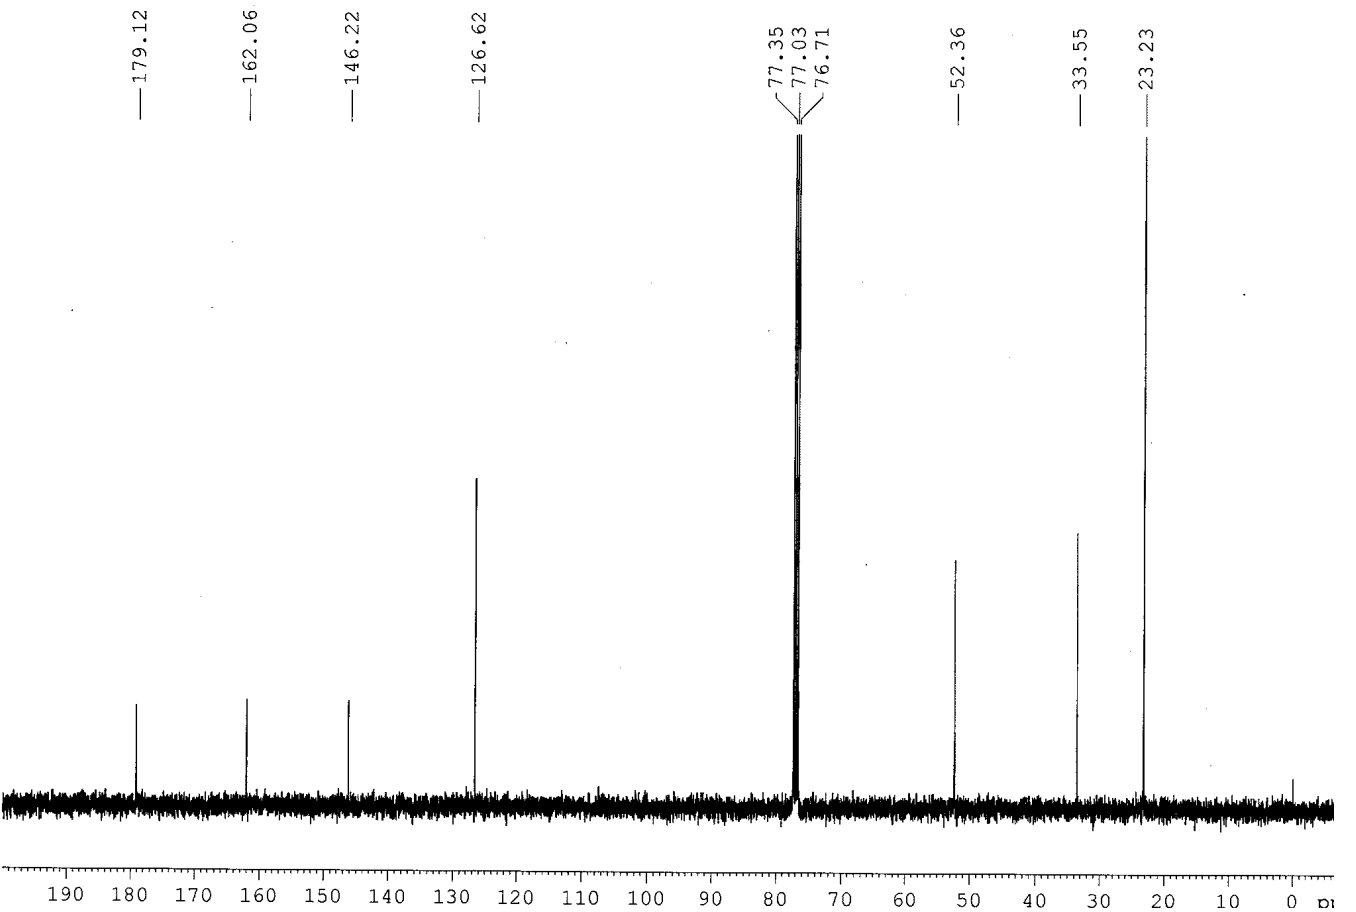



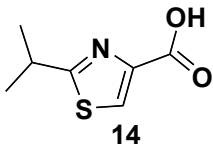

007-072-002-001

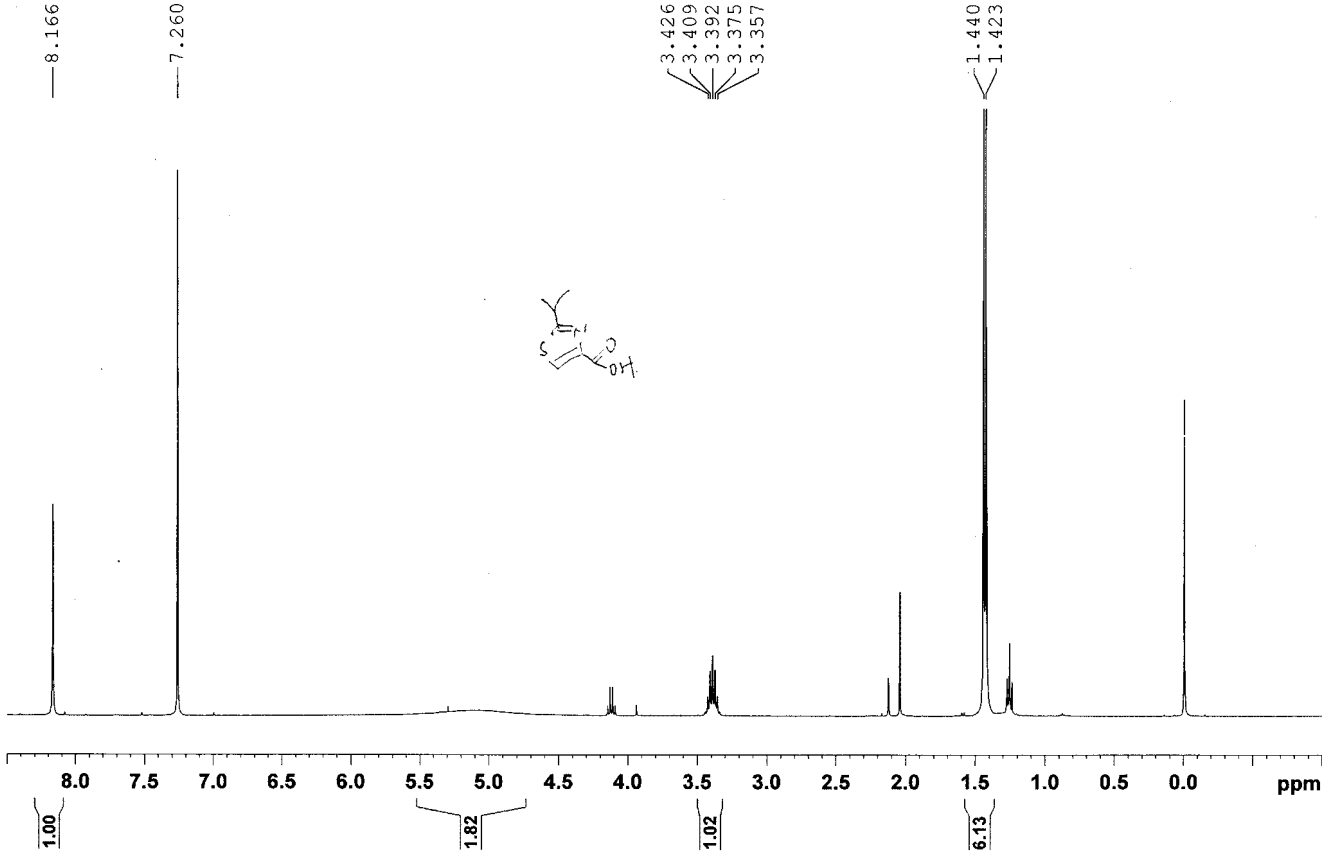

yielding acid

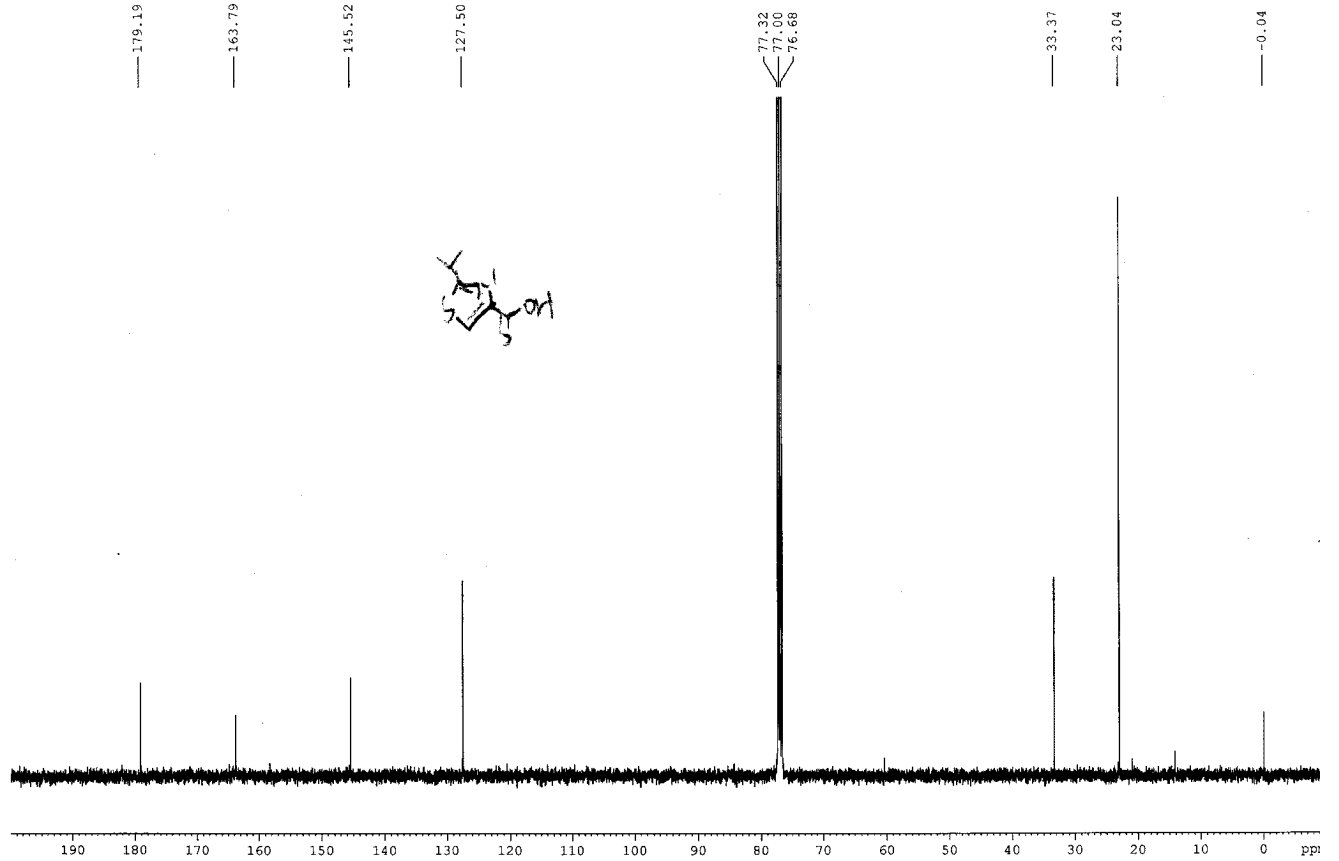

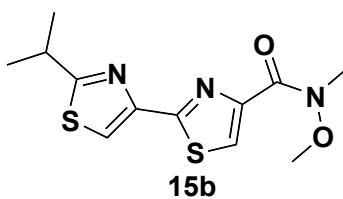

007-076-002

8.003  
7.894

7.260

3.818  
3.462  
3.401  
3.384  
3.367  
3.350  
3.332

1.452  
1.434

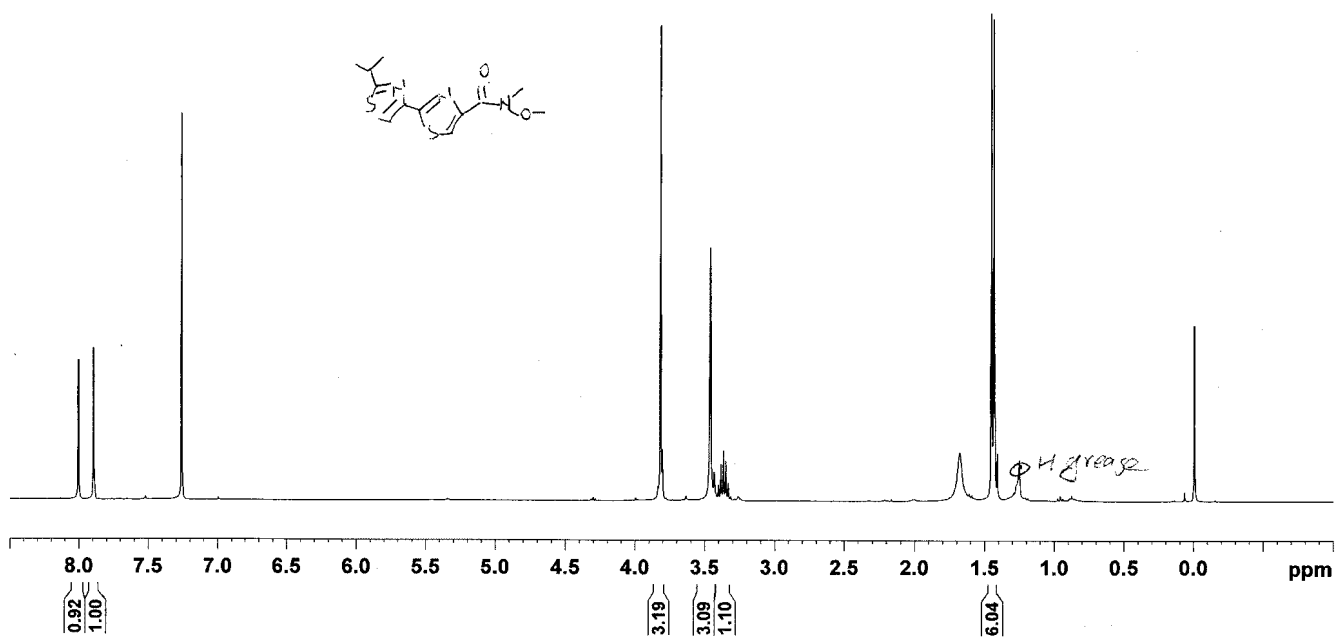

07-077-001

176.79

163.12  
162.29

149.21  
148.18

125.09

115.40

77.33  
77.01  
76.70

61.54

33.33

23.09

-0.02

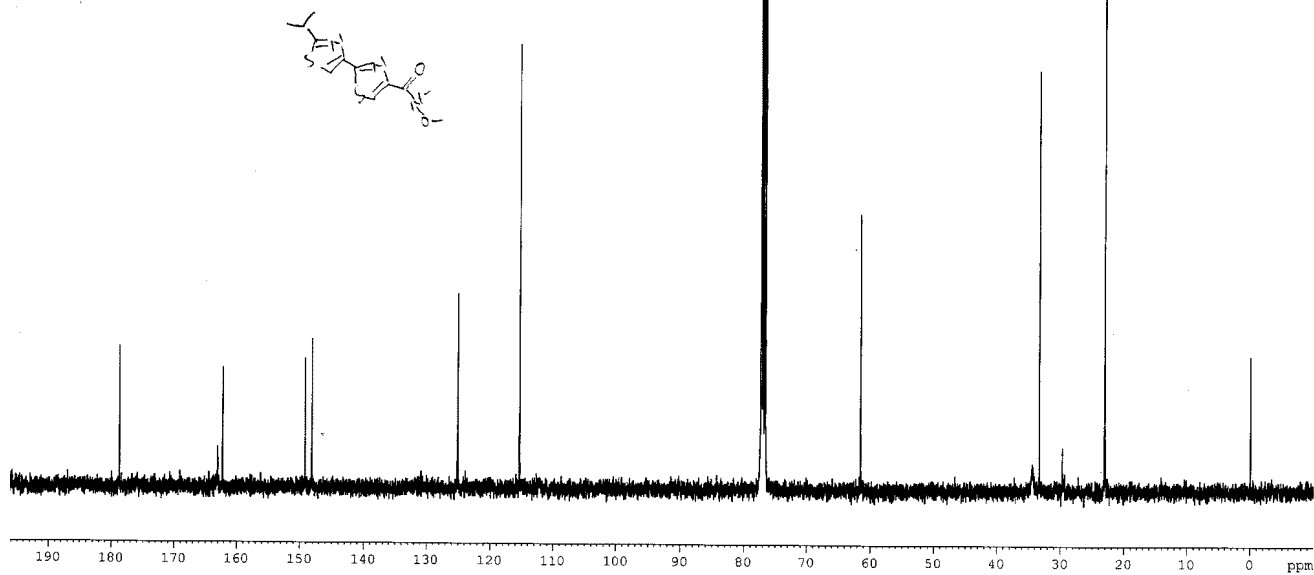

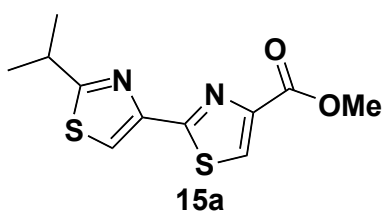

008-028-002-002

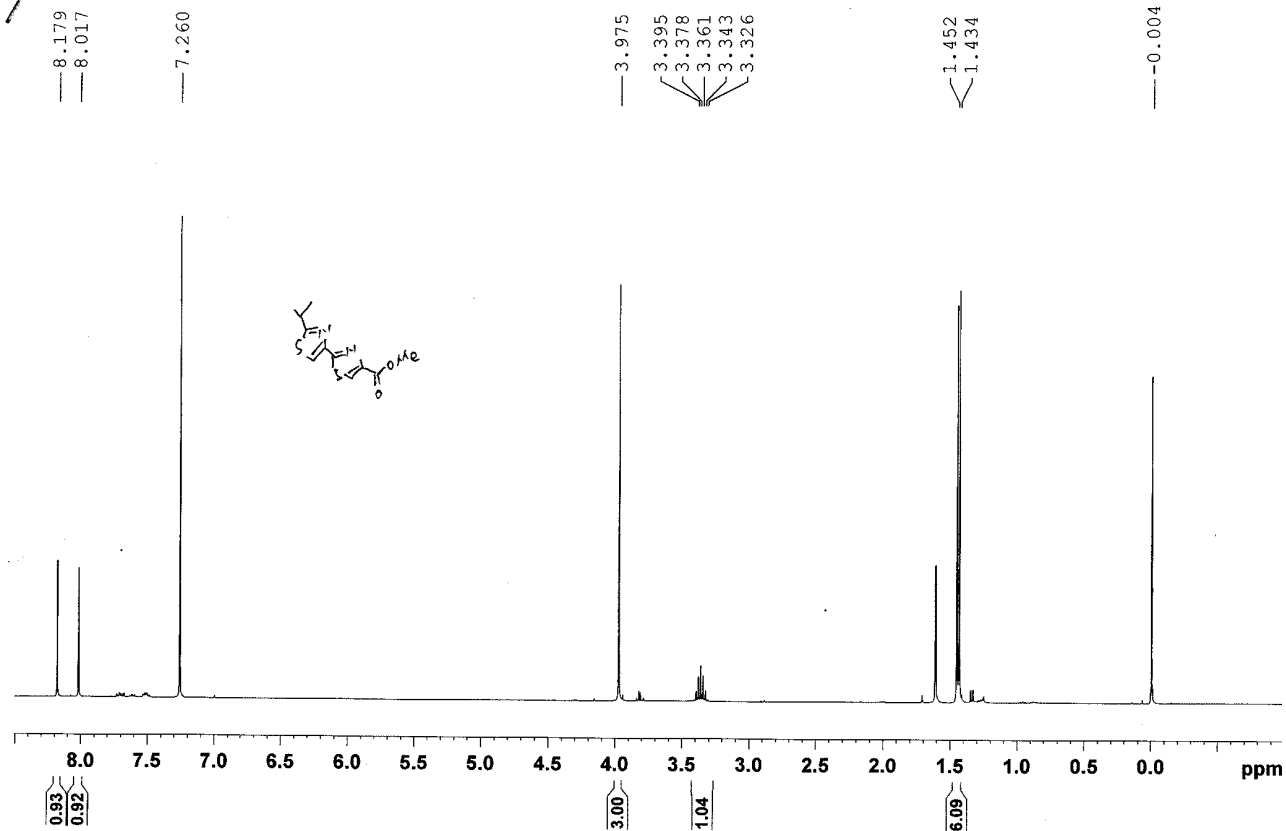

008-028-001-002

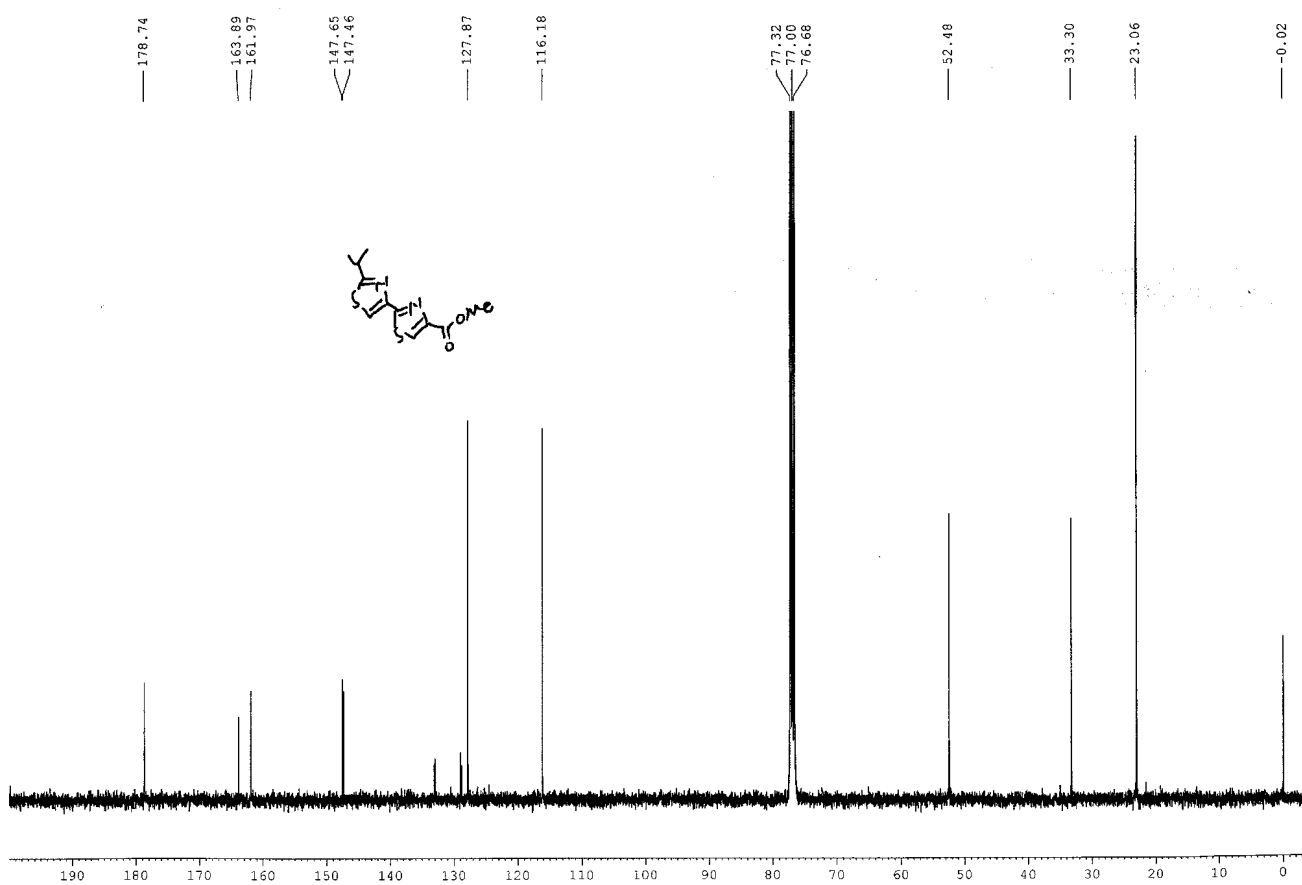

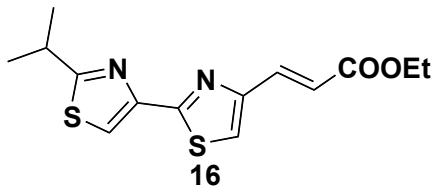

007-078-002-002

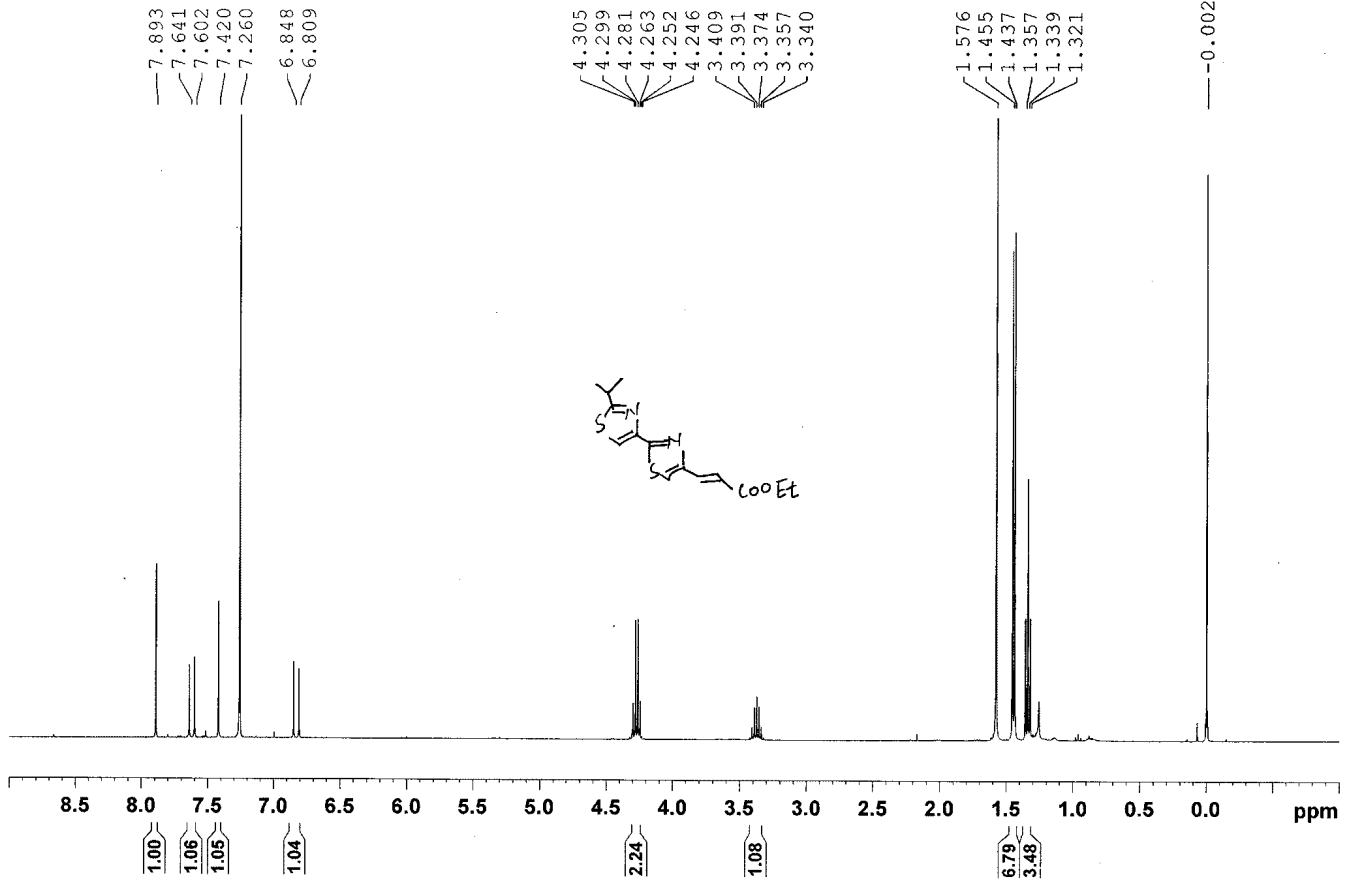

07-078-002-002

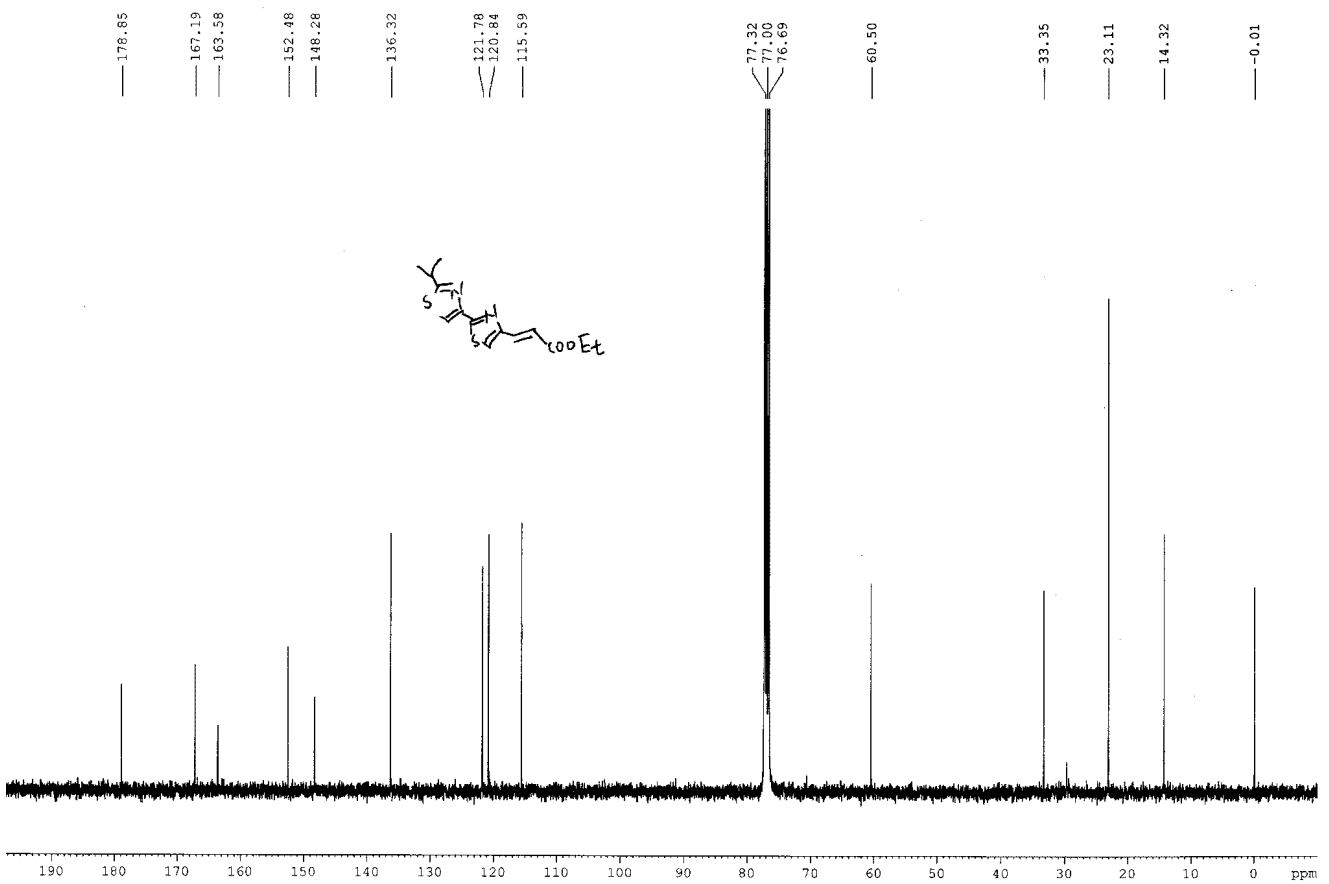

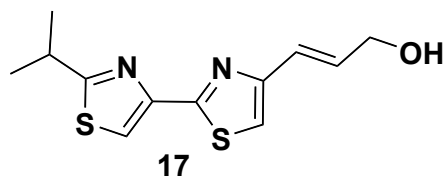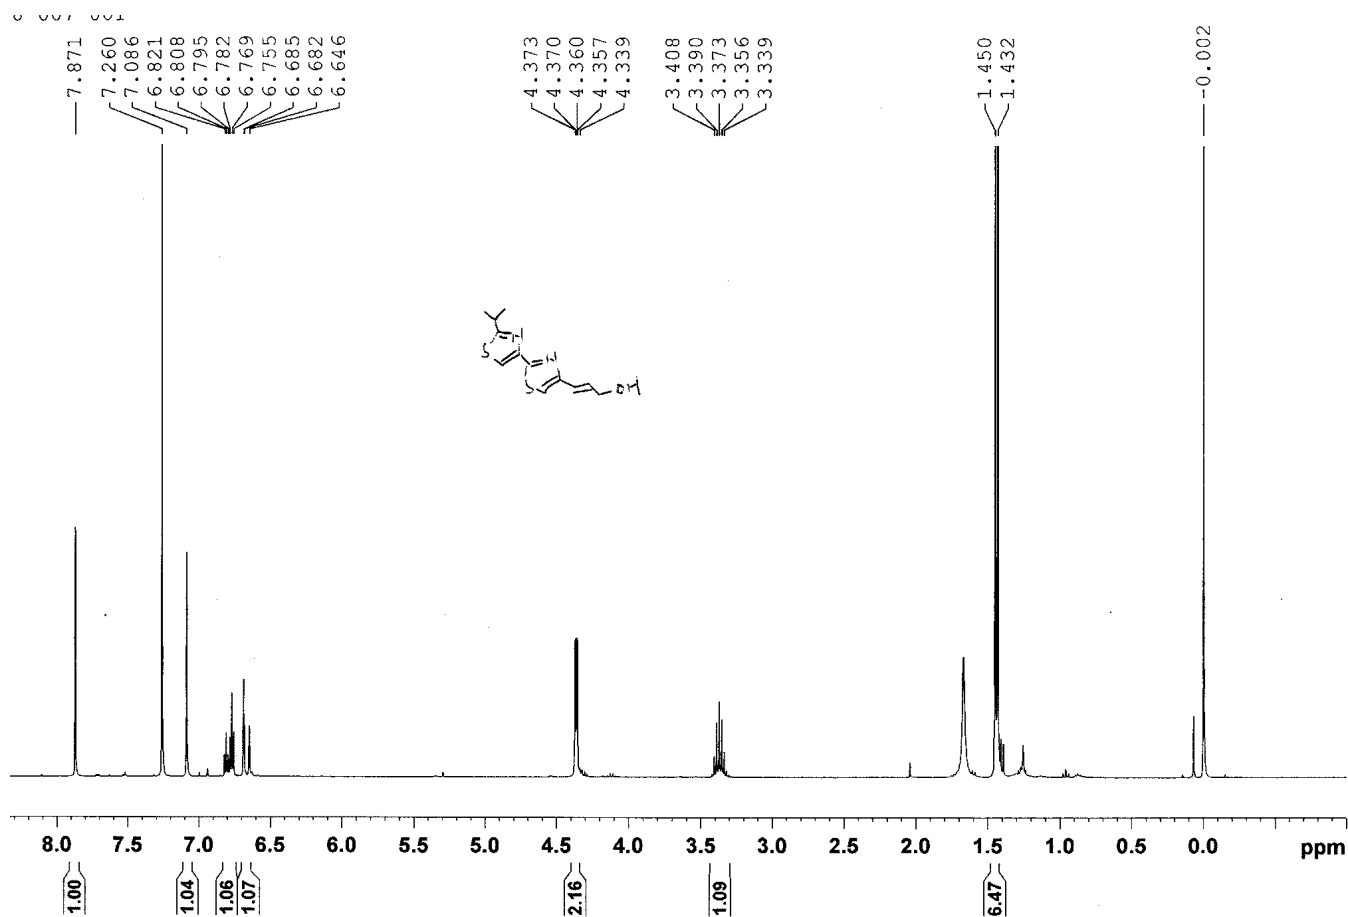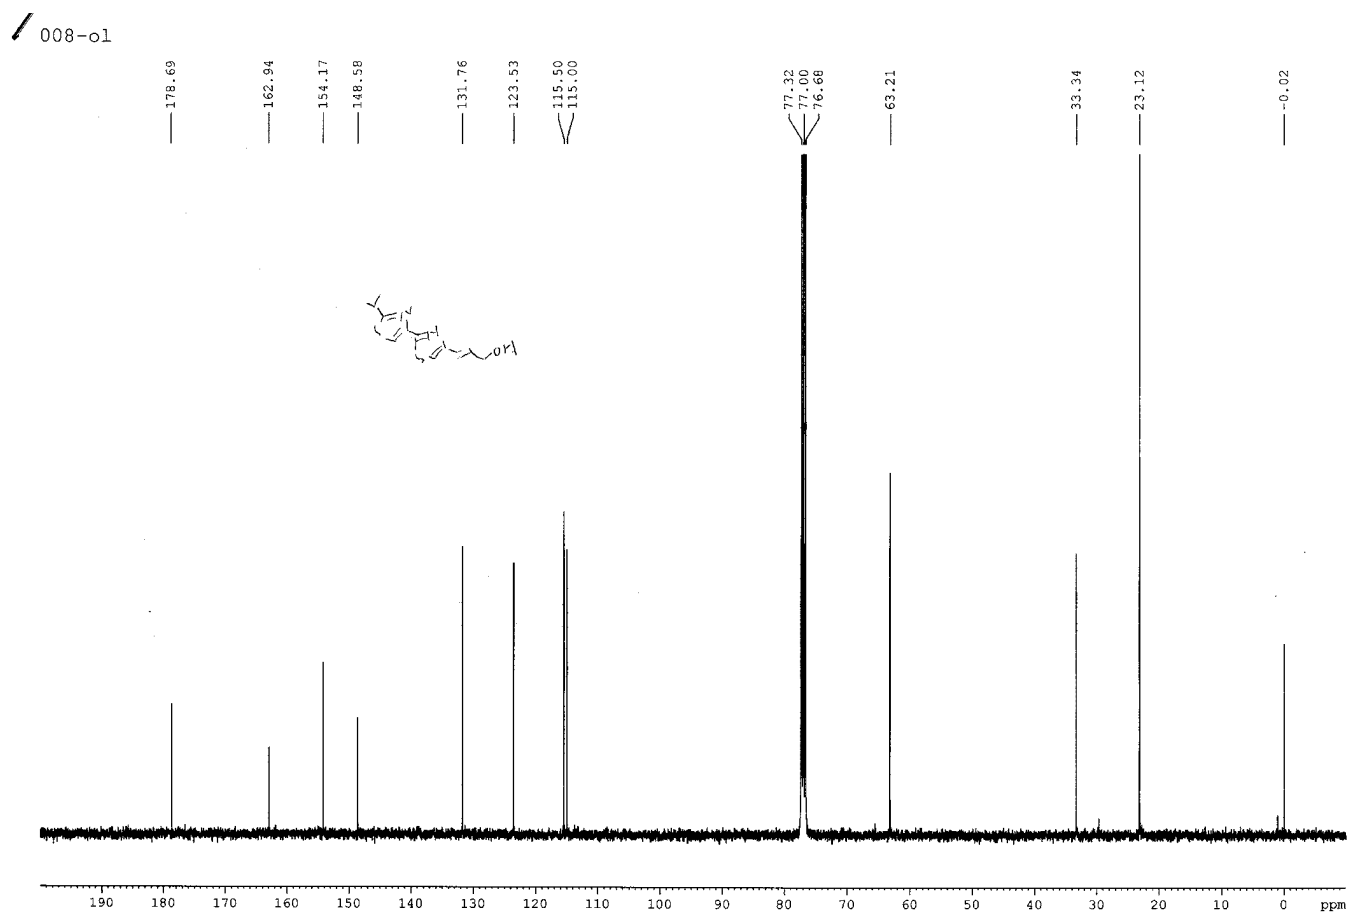

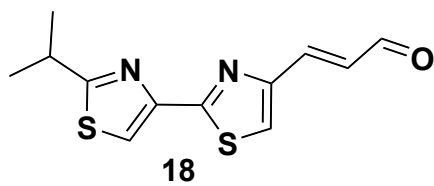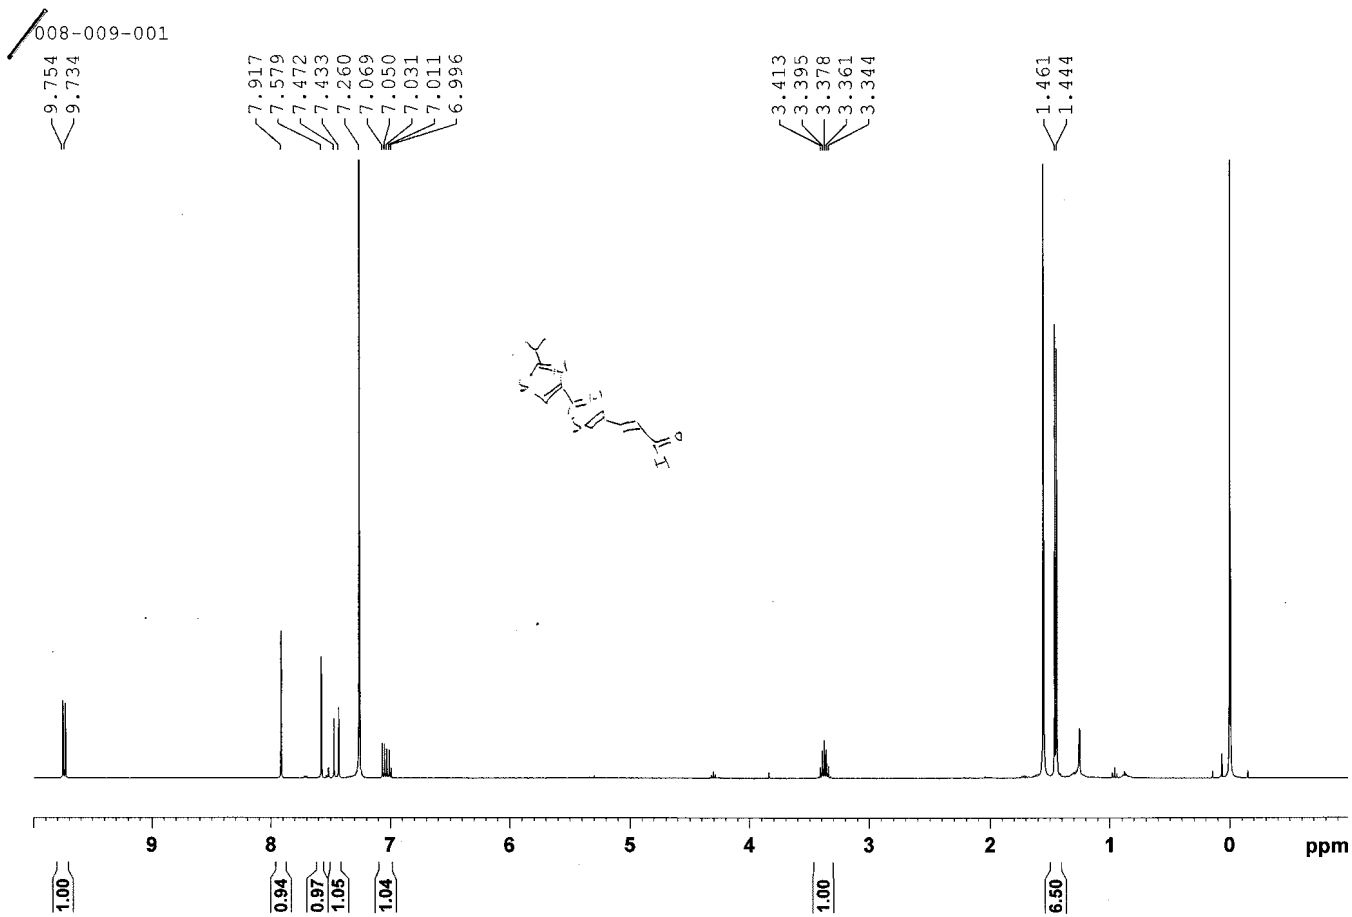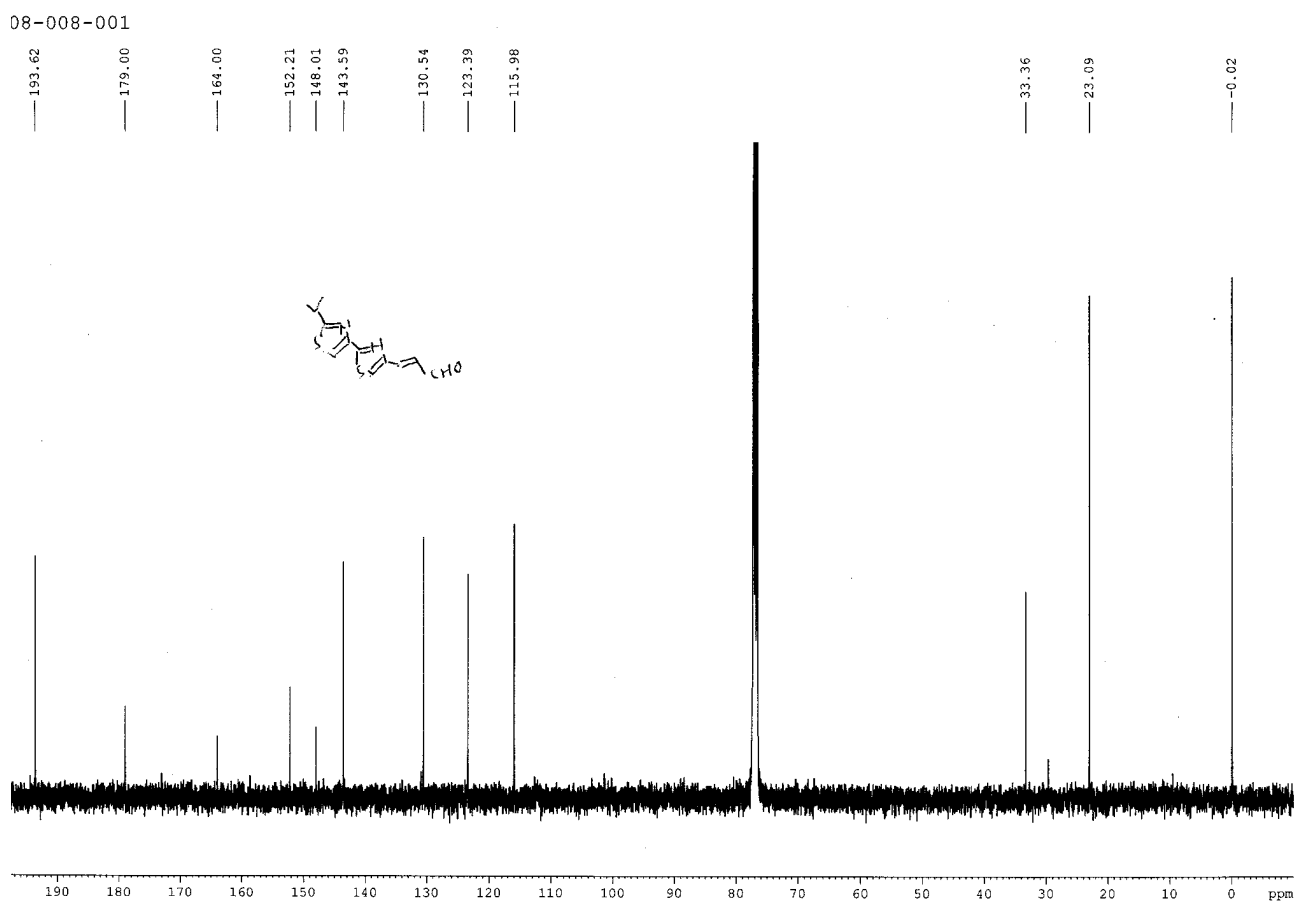

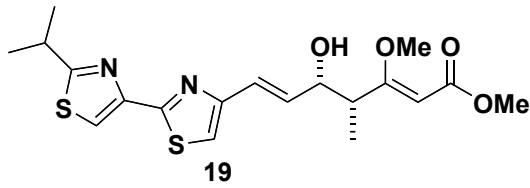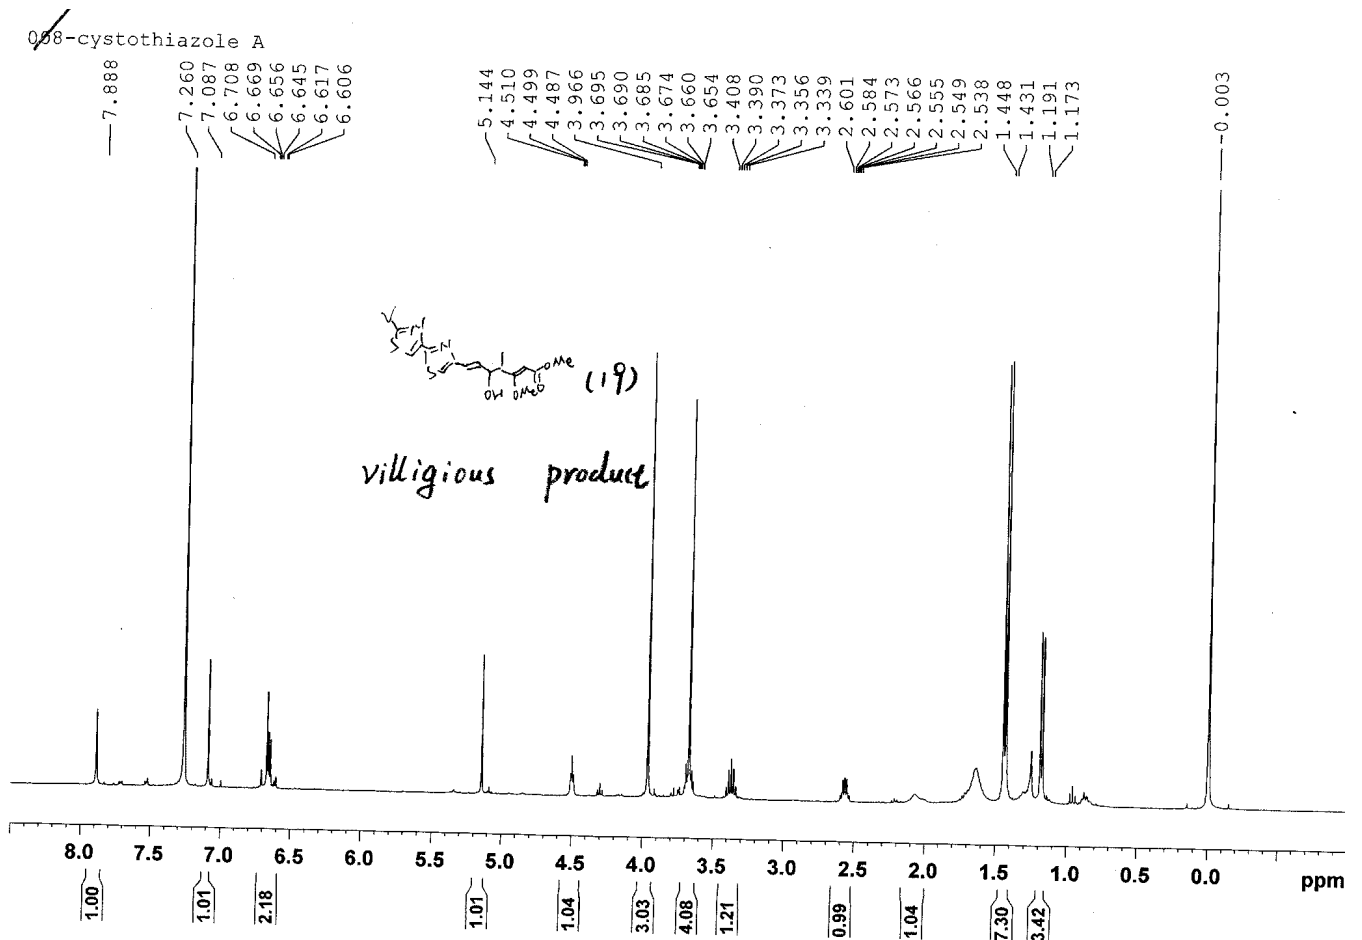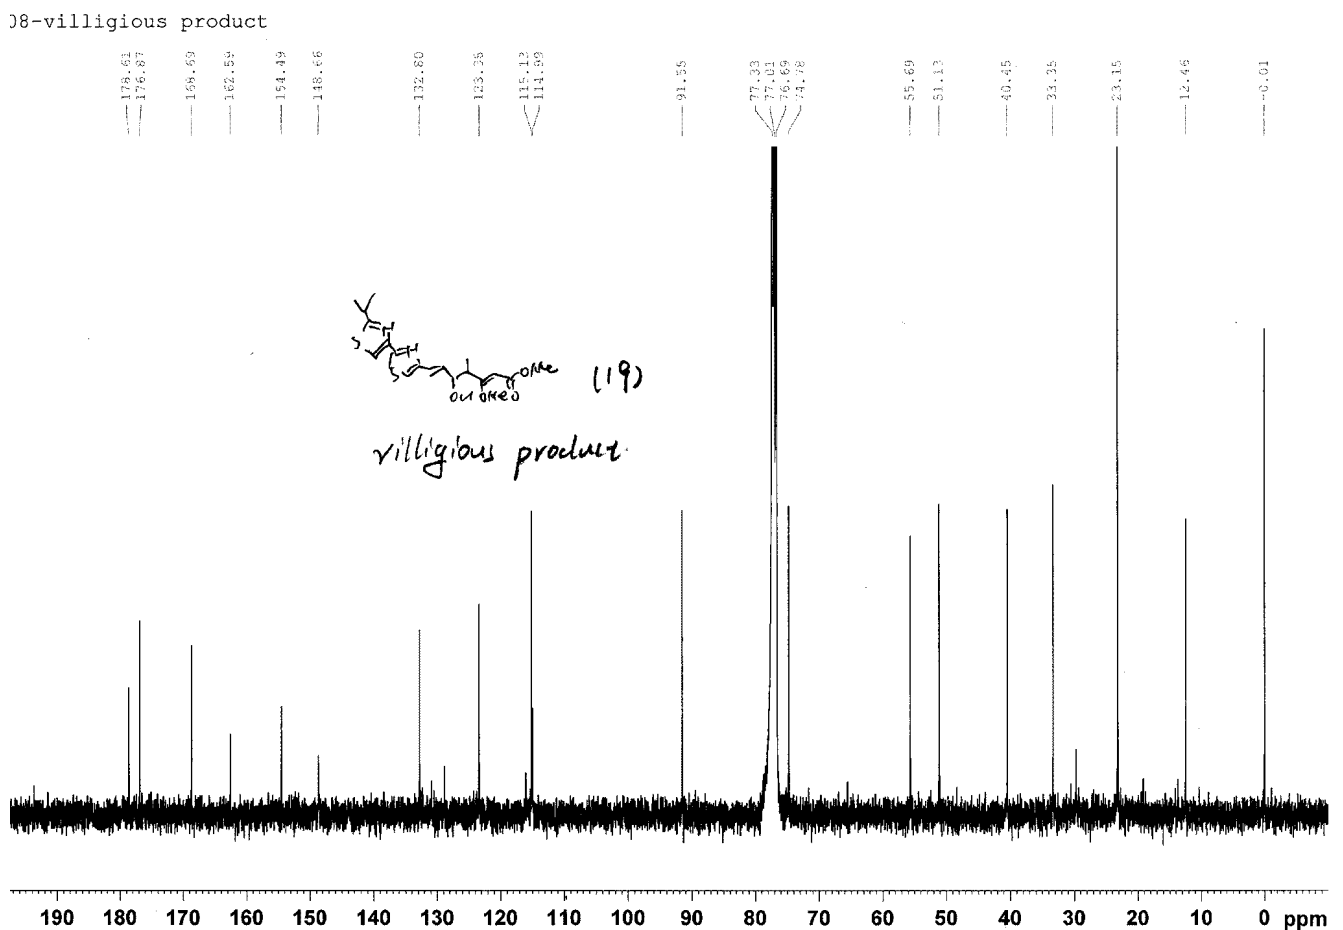

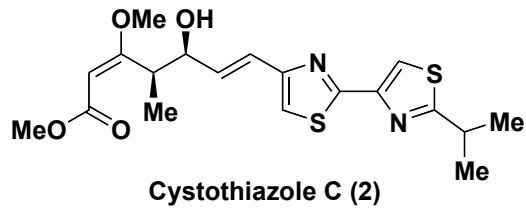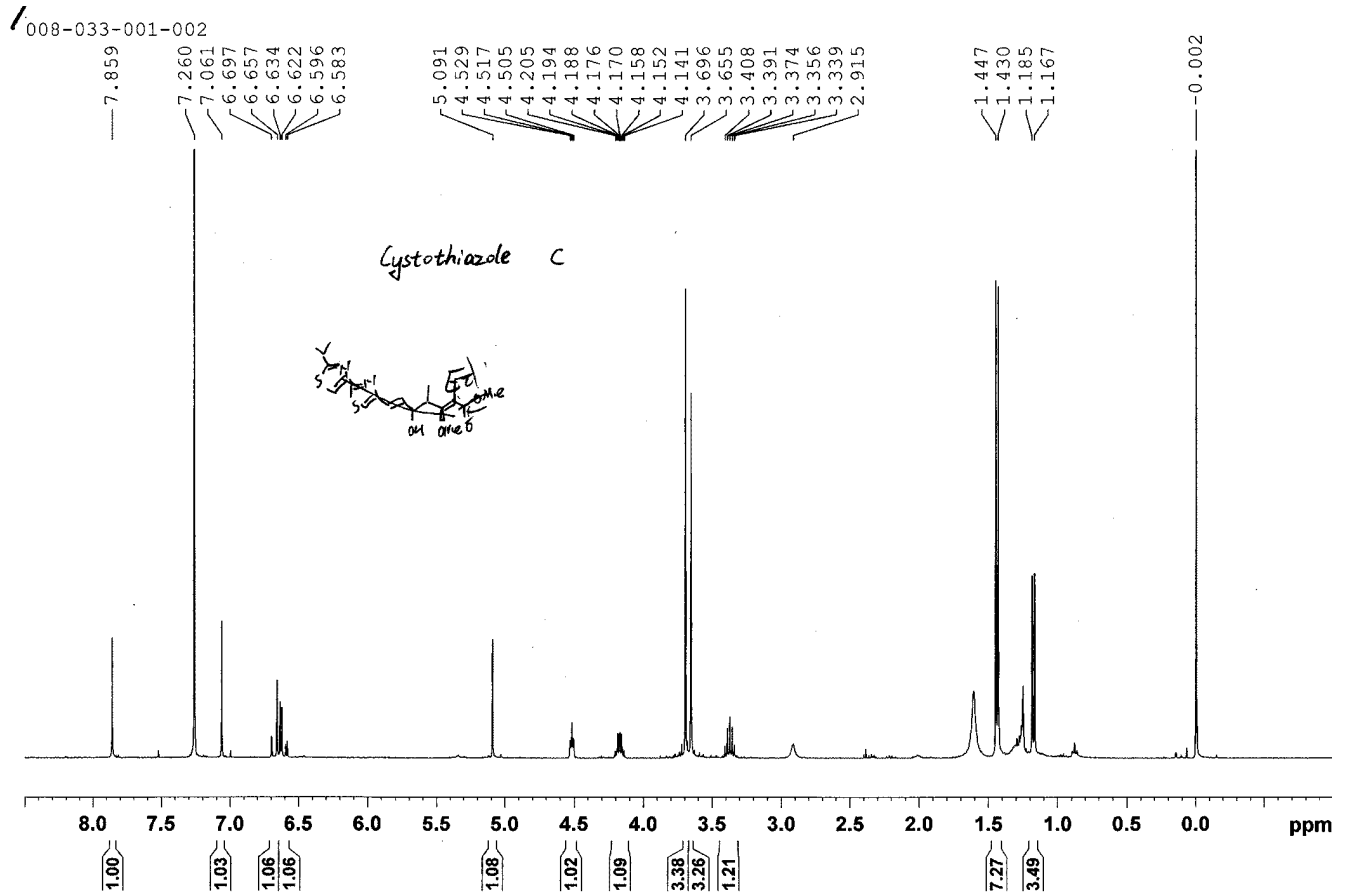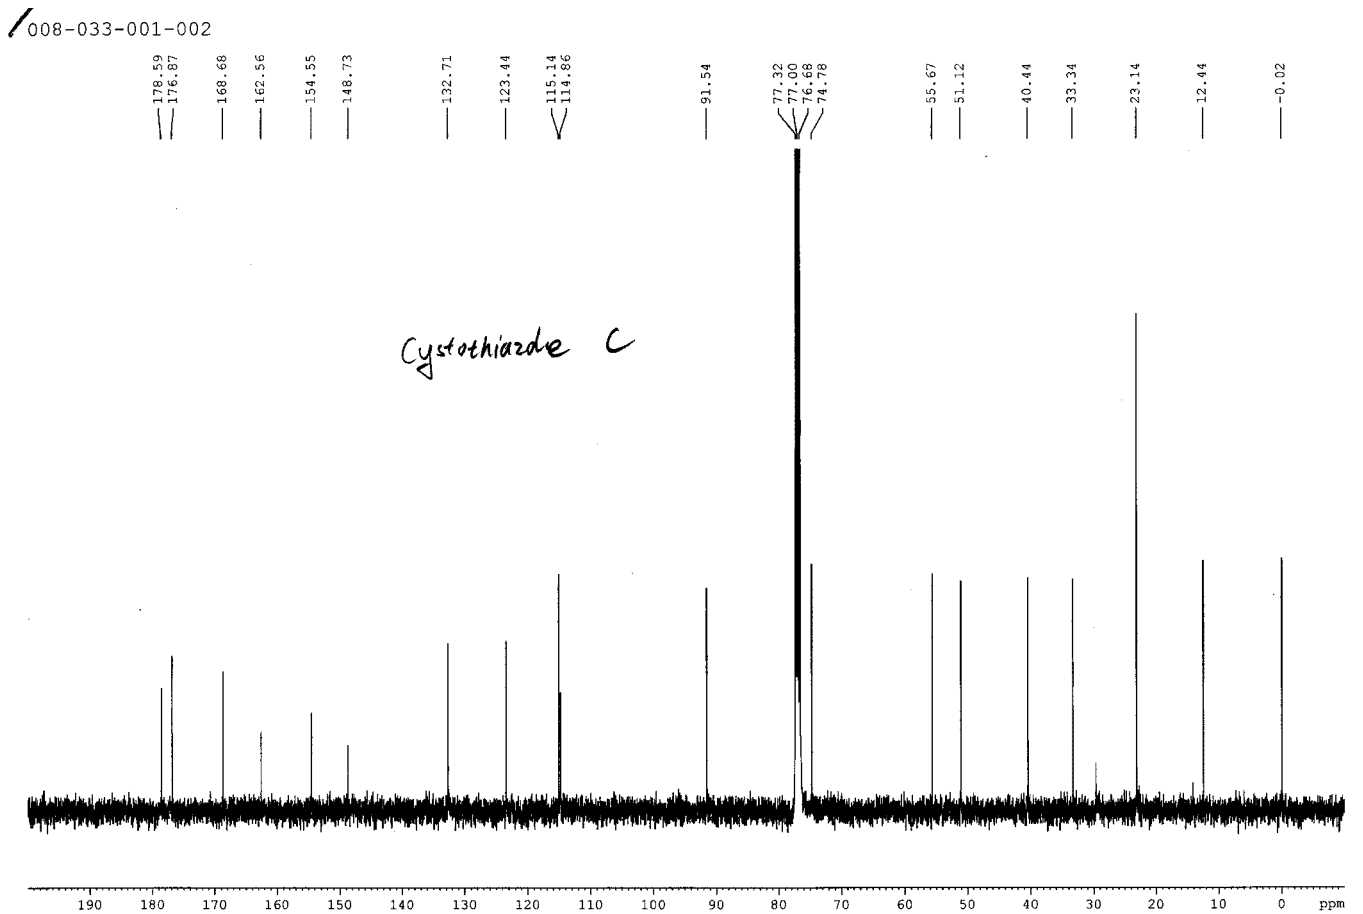

Supplement: c4ob01460j1.pdf [file c4ob01460j1.pdf]
